# Supplementary material
Source: PubMed Central journal article supplement (PMC5478675)
Supplement: NIHMS852337-supplement-1.pdf [file NIHMS852337-supplement-1.pdf]

## SUPPLEMENTARY INFORMATION

### Structural implications for the formation and function of the complement effector protein iC3b

Malvina Papanastasiou<sup>a</sup>, Sophia Koutsogiannaki<sup>a</sup>, Yiannis Sarigiannis<sup>a</sup>, Brian V. Geisbrecht<sup>b</sup>,  
Daniel Ricklin<sup>a</sup>, John D. Lambris<sup>a</sup>

<sup>a</sup>*Department of Pathology and Laboratory Medicine, 401 Stellar Chance, 422 Curie Boulevard, Perelman School of Medicine, University of Pennsylvania, Philadelphia, PA 19104, United States*

<sup>b</sup>*Department of Biochemistry & Molecular Biophysics, Kansas State University, 101B Burt Hall, 1220 North 17<sup>th</sup> Street, Manhattan, KS 66506, United States*

#### This file contains:

Supplementary Table and Figure Legends:

Table S1: Average difference in peptide deuteration levels (%) between complement proteins iC3b and C3b.

Fig. S1: D-uptake plots of C3b and iC3b peptides.

Fig. S2: anti-iC3b mAb reactivity using direct ELISA.

Fig. S3: Binding profile of different C3 fragments to the captured anti-iC3b mAb.

#### References

1. Behrendt, N. 1985. Human complement component C3: Characterization of active C3 S and C3 F, the two common genetic variants. *Mol Immunol* 22: 1005-1008.
2. Bai, Y., J. S. Milne, L. Mayne, and S. W. Englander. 1993. Primary structure effects on peptide group hydrogen exchange. *Proteins* 17: 75-86.
3. Morris, G. E. 1996. Epitope mapping of protein antigens by competition ELISA. In *The Protein Protocols Handbook*. J. Walker, ed. Humana Press. 595-600.
4. Hammel, M., G. Sfyroera, D. Ricklin, P. Magotti, J. D. Lambris, and B. V. Geisbrecht. 2007. A structural basis for complement inhibition by *Staphylococcus aureus*. *Nat Immunol* 8: 430-437.

**Table S1: Average difference in peptide deuteration levels (%) between complement proteins iC3b and C3b**

| Peptide                             | Start | End  | Domain                | Average D-uptake difference (%) |        |         |         |          |          |           |           |
|-------------------------------------|-------|------|-----------------------|---------------------------------|--------|---------|---------|----------|----------|-----------|-----------|
|                                     |       |      |                       | 10 sec                          | 30 sec | 100 sec | 300 sec | 1000 sec | 3000 sec | 10000 sec | 25200 sec |
| VTVHDFPGKLV                         | 35    | 47   | MG1                   | 10.8                            | 9.0    | 4.7     | 1.8     | -0.4     | 0.3      | 2.4       | 2.3       |
| FKSEKGRNKFVTVQ (C3 <sub>80R</sub> ) | 74    | 87   | MG1                   | 11.1                            | 9.6    | 11.7    | 7.4     | 6.7      | 5.2      | 9.5       | 12.1      |
| VVEKVV                              | 94    | 100  | MG1                   | 2.2                             | 6.4    | 11.5    | 20.8    | 21.2     | 10.3     | 2.7       | 1.6       |
| VNIENPEGIPVKQDSL                    | 143   | 158  | MG2                   | -0.2                            | 2.3    | 5.5     | 6.3     | 9.3      | 12.3     | 5.3       | 3.9       |
| VNIENPEGIPVKQDSLSSQNQL              | 143   | 164  | MG2                   | 3.8                             | 4.2    | 5.2     | 7.5     | 8.4      | 5.1      | 5.9       | 3.3       |
| SSQNQLGVLPLSWDIPEL                  | 159   | 176  | MG2                   | 1.4                             | 6.7    | 8.4     | 3.7     | 2.7      | 2.5      | 2.4       | 0.9       |
| GVLPLSWDIPEL                        | 165   | 176  | MG2                   | 4.3                             | 8.8    | 10.3    | 4.7     | 3.6      | 3.8      | 2.1       | -0.2      |
| VNMGQWKIRA                          | 177   | 186  | MG2                   | 1.9                             | 4.5    | 4.2     | 3.2     | 4.7      | 0.9      | 7.9       | 9.7       |
| YYENSPQQVF                          | 187   | 196  | MG2                   | 1.8                             | 4.2    | 4.4     | 4.4     | 4.8      | 9.0      | 7.3       | 4.7       |
| YYENSPQQVFSTE                       | 187   | 199  | MG2                   | 1.0                             | 2.9    | 6.0     | 8.7     | 7.9      | 5.0      | 5.7       | 4.1       |
| VRTLDPERLGRGVQ                      | 922   | 936  | CUB <sup>g</sup>      | 68.7                            | 65.8   | 60.9    | 54.3    | 42.8     | 33.0     | 22.5      | 19.2      |
| VRTLDPERLGRGVQKEDIPPADL             | 922   | 945  | CUB <sup>g</sup>      | 64.5                            | 60.6   | 56.4    | 51.7    | 45.0     | 38.3     | 29.5      | 25.5      |
| SDQVPDTESE                          | 946   | 955  | CUB <sup>g</sup>      | 74.9                            | 68.7   | 62.6    | 57.1    | 52.3     | 46.7     | 37.0      | 31.8      |
| SDQVPDTESET                         | 946   | 956  | CUB <sup>g</sup>      | 76.5                            | 70.3   | 66.8    | 64.1    | 60.1     | 52.7     | 40.7      | 34.3      |
| SDQVPDTESETRILL                     | 946   | 960  | CUB <sup>g</sup>      | 81.9                            | 78.8   | 76.8    | 74.2    | 74.6     | 69.1     | 62.3      | 58.0      |
| SDQVPDTESETRILLQGTTPVAQM            | 946   | 968  | CUB <sup>g</sup> /TED | 79.2                            | 74.3   | 70.2    | 67.8    | 61.5     | 56.4     | 48.9      | 43.6      |
| TRILLQGTTPVAQM                      | 956   | 968  | CUB <sup>g</sup> /TED | 67.6                            | 63.9   | 57.7    | 51.9    | 45.6     | 38.8     | 33.6      | 29.8      |
| TRILLQGTTPVAQMTEDE                  | 956   | 971  | CUB <sup>g</sup> /TED | 66.6                            | 61.1   | 53.7    | 46.7    | 37.2     | 29.9     | 26.5      | 27.7      |
| RILLQGTTPVAQM                       | 957   | 968  | CUB <sup>g</sup> /TED | 68.5                            | 66.3   | 60.8    | 54.4    | 48.2     | 40.0     | 34.3      | 31.5      |
| AVDAERLKHIVTPSGGCEqNM               | 972   | 993  | TED                   | 50.1                            | 53.5   | 51.9    | 48.3    | 42.4     | 36.7     | 33.3      | 31.1      |
| AERLKHIVT                           | 975   | 984  | TED                   | 74.2                            | 77.2   | 73.9    | 73.8    | 72.4     | 68.3     | 67.3      | 63.4      |
| AERLKHIVTPSGGCEqNM                  | 975   | 993  | TED                   | 45.1                            | 47.7   | 45.1    | 42.3    | 38.0     | 34.3     | 32.8      | 31.1      |
| IGMTPTVIAVHYLDE                     | 994   | 1008 | TED                   | -0.4                            | -1.0   | 1.6     | 2.8     | 8.8      | 11.5     | 16.5      | 16.9      |
| IGMTPTVIAVHYLDETEQ                  | 994   | 1011 | TED                   | -0.4                            | -0.2   | 1.0     | 3.9     | 9.6      | 15.6     | 18.3      | 17.1      |
| IAVHYLDETEQ                         | 1001  | 1011 | TED                   | -1.1                            | 1.1    | 1.8     | 4.0     | 8.0      | 15.2     | 16.7      | 14.5      |
| AVHYLDETEQ                          | 1002  | 1011 | TED                   | 0.0                             | 0.1    | 2.3     | 5.0     | 10.0     | 14.7     | 14.3      | 14.6      |
| VHYLDETEQ                           | 1003  | 1011 | TED                   | -0.2                            | 0.8    | 2.4     | 3.5     | 8.5      | 14.0     | 15.7      | 14.3      |
| WEKFGLEKRQAL                        | 1012  | 1024 | TED                   | 13.3                            | 17.4   | 20.1    | 18.2    | 10.8     | 4.3      | 3.6       | 1.9       |
| WEKFGLEKRQALE                       | 1012  | 1025 | TED                   | 10.9                            | 14.0   | 17.1    | 19.9    | 11.4     | 5.1      | 1.6       | 2.1       |
| WEKFGLEKRQALEL                      | 1012  | 1026 | TED                   | 9.8                             | 13.3   | 14.9    | 15.1    | 8.9      | 3.1      | 3.2       | 4.5       |
| VVKVFLAVNL                          | 1060  | 1070 | TED                   | 5.8                             | 8.9    | 12.4    | 8.9     | 12.5     | 13.5     | 5.8       | 0.6       |
| QRYGGGGYSTQ                         | 1237  | 1248 | TED                   | 29.6                            | 26.5   | 20.4    | 15.3    | 11.5     | 4.4      | 1.5       | 1.8       |
| QRYGGGGYSTQATF                      | 1237  | 1251 | TED                   | 23.2                            | 22.1   | 17.3    | 14.0    | 9.0      | 7.1      | 7.6       | 5.8       |
| MVFQALAQYKQDAPDHQELNL               | 1252  | 1272 | TED/CUB <sup>f</sup>  | 22.6                            | 22.7   | 20.5    | 19.0    | 19.0     | 20.4     | 23.3      | 23.1      |
| QALAQYKQDAPDHQELNL                  | 1255  | 1272 | TED/CUB <sup>f</sup>  | 25.8                            | 27.2   | 24.2    | 20.6    | 19.6     | 22.7     | 24.9      | 23.8      |
| AQYKQDAPDHQELNL                     | 1258  | 1272 | TED/CUB <sup>f</sup>  | 31.3                            | 33.1   | 29.2    | 24.2    | 23.4     | 25.2     | 27.6      | 26.4      |
| YQKQDAPDHQELNL                      | 1260  | 1272 | TED/CUB <sup>f</sup>  | 42.2                            | 44.0   | 38.5    | 31.4    | 28.1     | 27.2     | 25.0      | 20.4      |
| LDVSLQLPSRSSKITHRIHWESAS (C3b)      | 1272  | 1295 | CUB <sup>f</sup>      | 49.4                            | 56.0   | 61.9    | 66.8    | 72.6     | 77.1     | 79.2      | 82.5      |
| DVSLQLPSR (iC3b)                    | 1273  | 1281 | CUB <sup>f</sup>      | 81.6                            | 96.2   | 99.5    | 100.0   | 99.0     | 99.6     | 99.6      | 99.3      |
| DVSLQLPSRSSKI (C3b)                 | 1273  | 1285 | CUB <sup>f</sup>      | 34.4                            | 33.9   | 37.6    | 43.7    | 54.2     | 61.9     | 67.5      | 68.6      |
| DVSLQLPSRSSKITHRIHWESASL (C3b)      | 1273  | 1296 | CUB <sup>f</sup>      | 48.0                            | 55.8   | 61.7    | 66.3    | 73.3     | 76.3     | 78.4      | 82.3      |
| SLQLPSRSSKITHRIHWESASL (C3b)        | 1275  | 1296 | CUB <sup>f</sup>      | 49.4                            | 59.7   | 61.6    | 66.8    | 71.7     | 75.0     | 82.1      | 86.6      |
| LQLPSR (iC3b)                       | 1276  | 1281 | CUB <sup>f</sup>      | 77.6                            | 92.5   | 98.9    | 99.1    | 98.8     | 99.4     | 99.1      | 100.0     |
| LQLPSRSSKIT (C3b)                   | 1276  | 1286 | CUB <sup>f</sup>      | 13.0                            | 18.5   | 24.5    | 28.5    | 35.5     | 45.3     | 52.3      | 55.2      |
| LRSEETKENE (C3b)                    | 1297  | 1307 | CUB <sup>f</sup>      | 31.5                            | 34.0   | 43.0    | 57.0    | 73.6     | 86.8     | 93.3      | 99.1      |
| LRSEETKENE (C3b)                    | 1297  | 1308 | CUB <sup>f</sup>      | 30.7                            | 34.8   | 40.9    | 52.5    | 69.9     | 81.2     | 86.8      | 90.2      |
| LRSEETKENEFTVTAEGKGGTL (C3b)        | 1297  | 1320 | CUB <sup>f</sup>      | 13.3                            | 14.1   | 18.0    | 23.4    | 32.0     | 40.4     | 46.7      | 50.0      |
| SEETKENEFTVT (iC3b)                 | 1299  | 1311 | CUB <sup>f</sup>      | 96.4                            | 97.6   | 96.7    | 98.5    | 100.0    | 98.9     | 96.9      | 98.1      |
| SEETKENEFTVTAEGKGGTL (iC3b)         | 1299  | 1320 | CUB <sup>f</sup>      | 99.6                            | 100.0  | 99.3    | 99.2    | 98.8     | 98.8     | 98.7      | 100.0     |
| TVTAEKGGQTL                         | 1309  | 1320 | CUB <sup>f</sup>      | 86.3                            | 86.8   | 85.0    | 82.3    | 78.0     | 73.8     | 70.9      | 66.7      |
| TVTAEKGGQTLV                        | 1309  | 1322 | CUB <sup>f</sup>      | 93.5                            | 93.2   | 92.1    | 90.4    | 88.1     | 82.9     | 79.5      | 75.8      |
| VTMYHAKAKDLTCNKFDL                  | 1323  | 1341 | CUB <sup>f</sup> /MG8 | 30.8                            | 29.1   | 26.2    | 24.3    | 20.9     | 20.9     | 18.6      | 18.2      |
| YHPEKEDGKL                          | 1471  | 1480 | anchor/CTC            | -18.2                           | -26.7  | -41.8   | -39.3   | -21.4    | -0.6     | 3.0       | 3.3       |

<sup>1</sup>Overall, 53 peptides with significant differences (>7%) during the course of the experiment were detected. Positive values indicate higher D-uptake levels and negative values lower levels for iC3b peptides. For peptides in CUB<sup>f</sup> that are unique in iC3b or C3b (in parentheses), average deuteration levels (%) are given. Peptide 74-87 is characteristic of the C3<sub>80R</sub> form (1). Deamidated glutamine residues, where detected, are indicated with a 'q' in the respective peptide sequences.

Figure S1

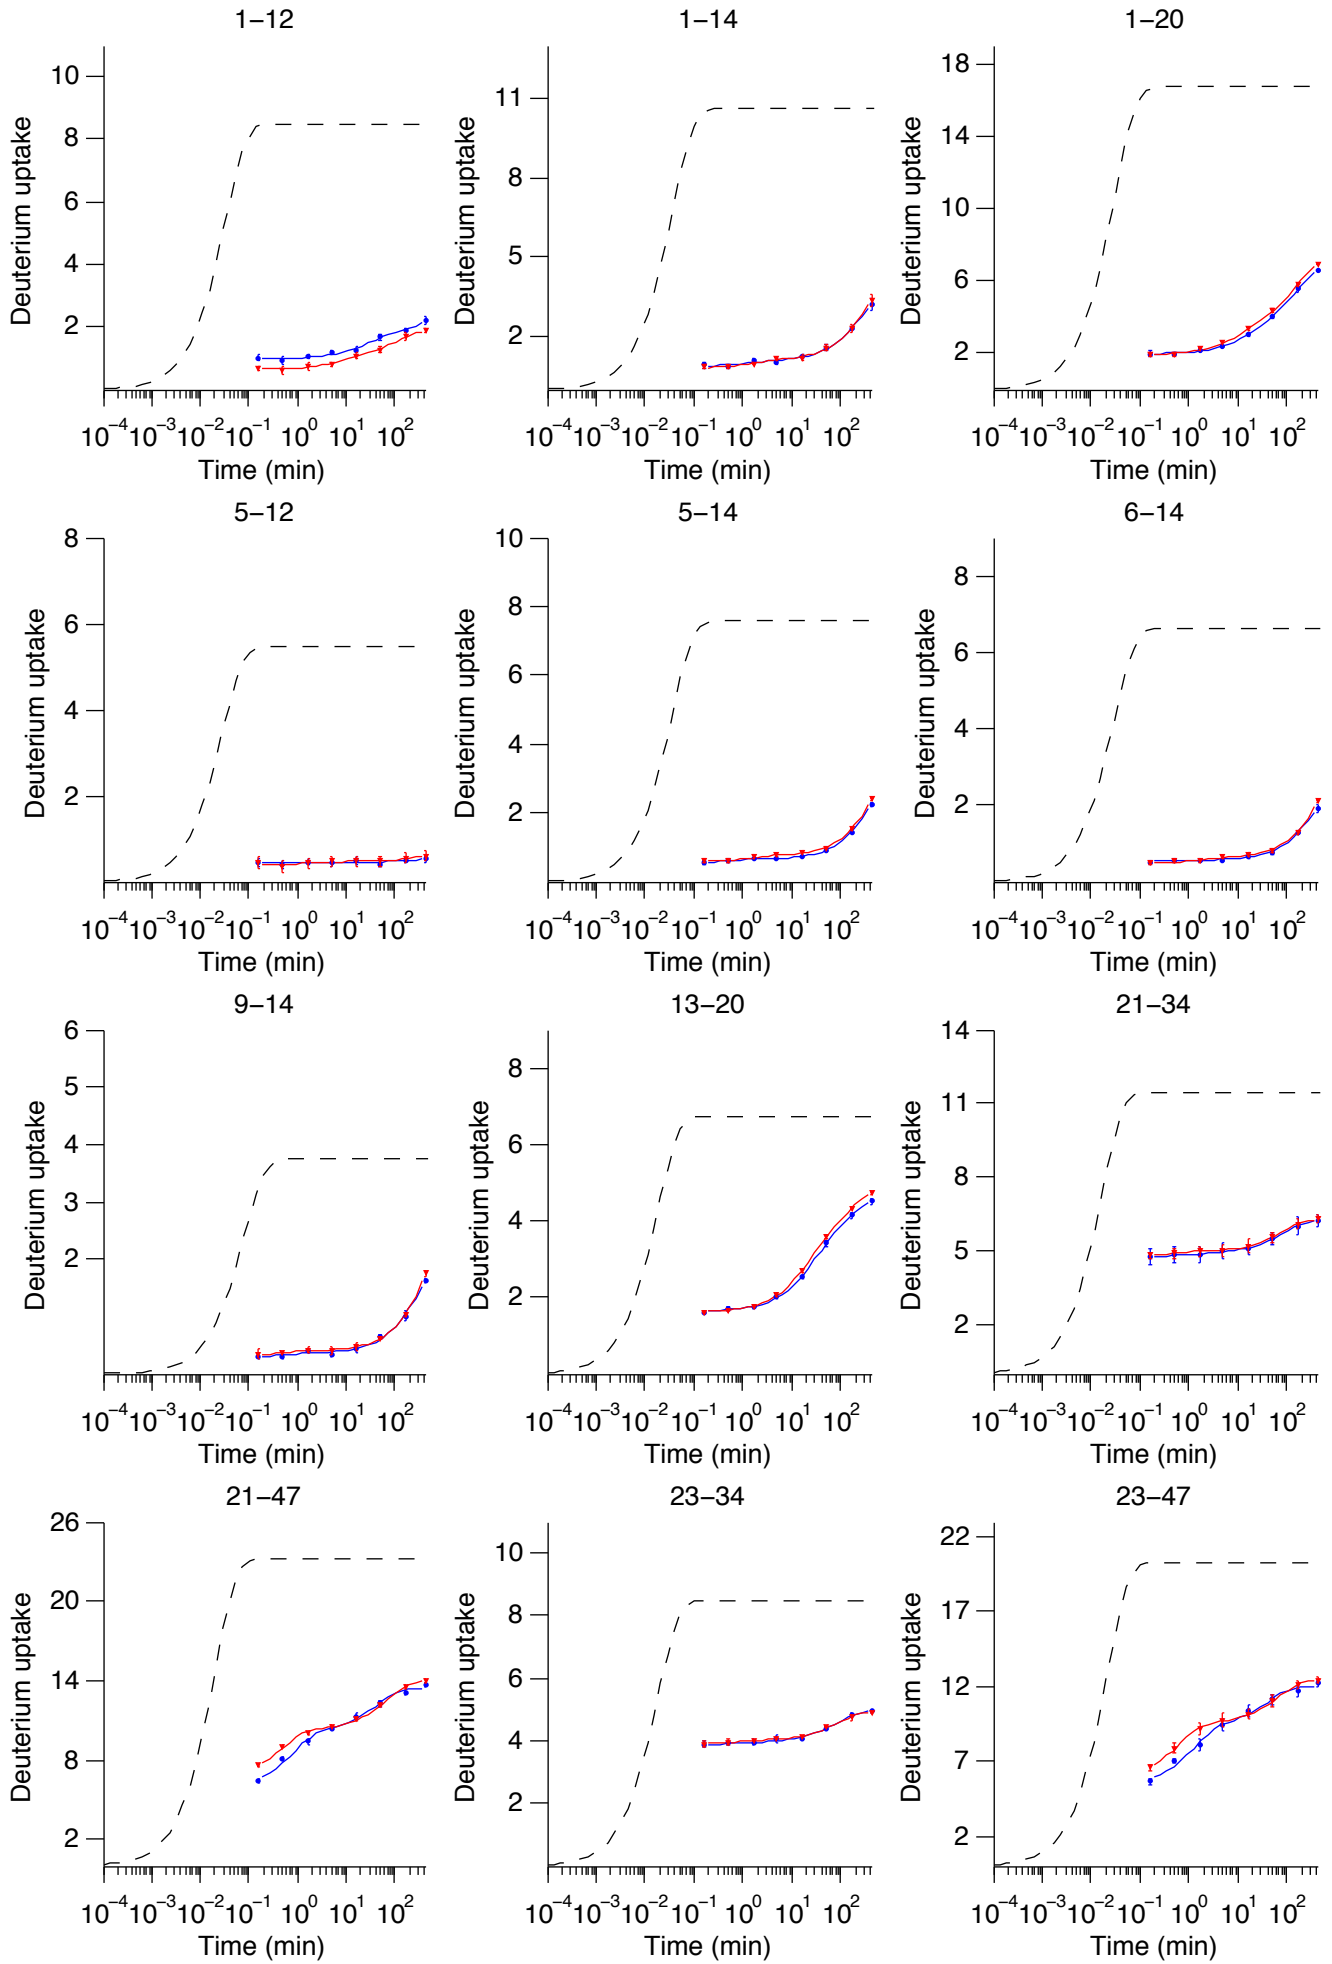

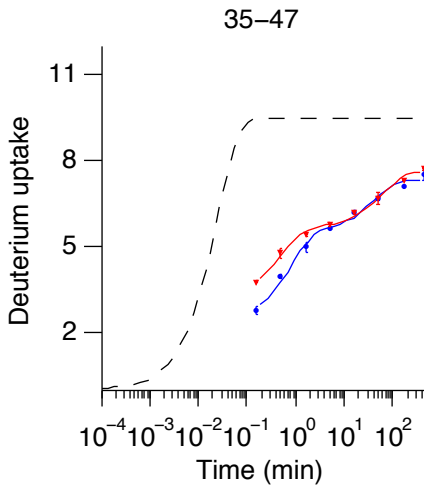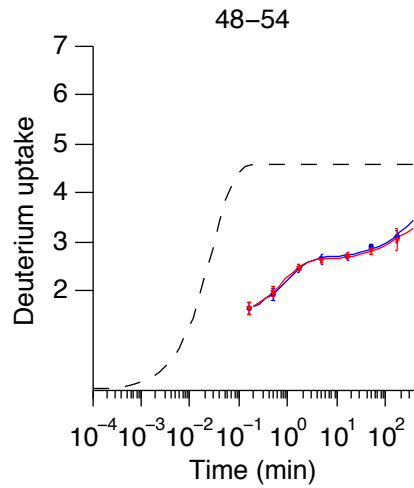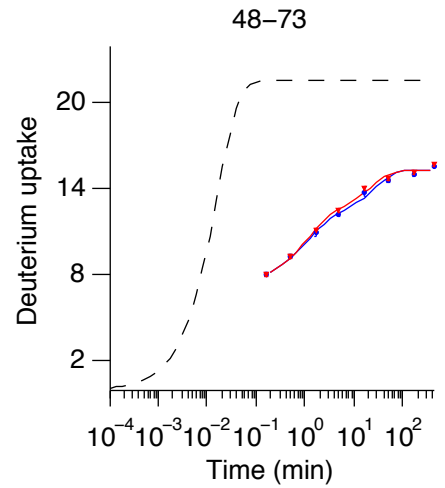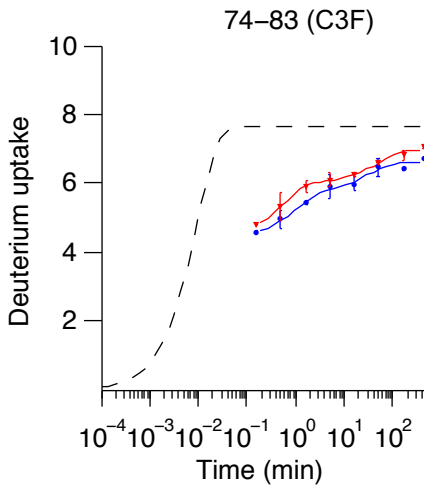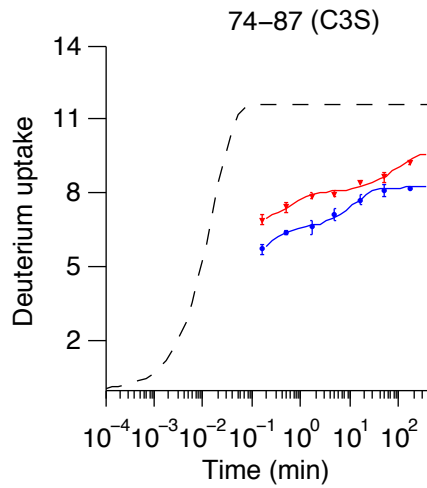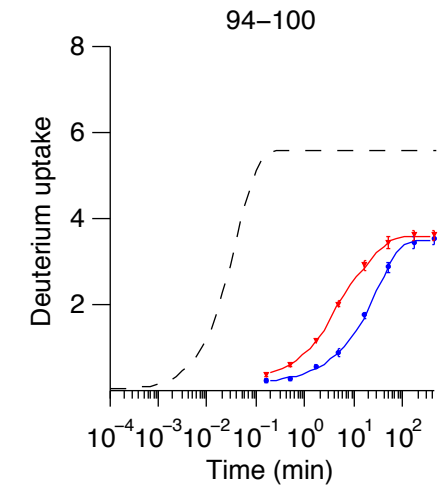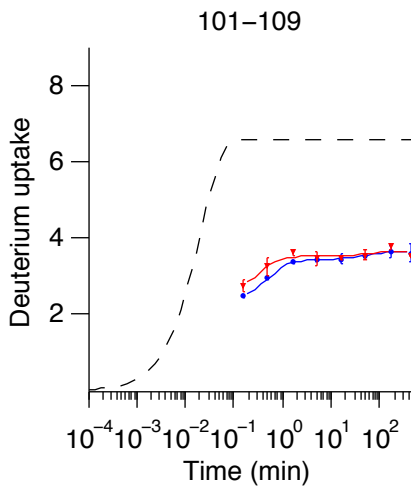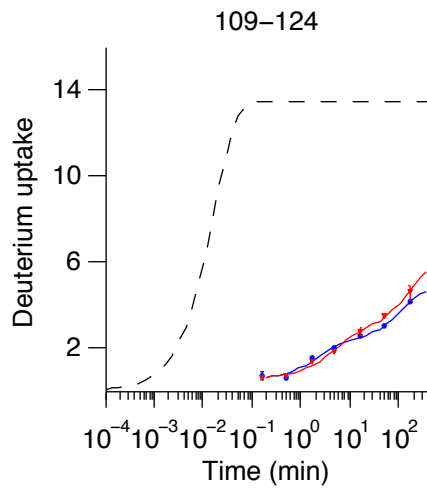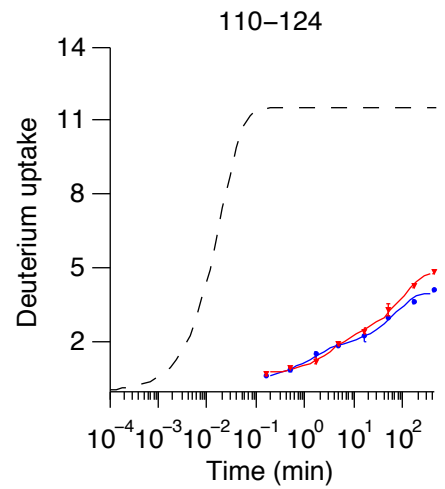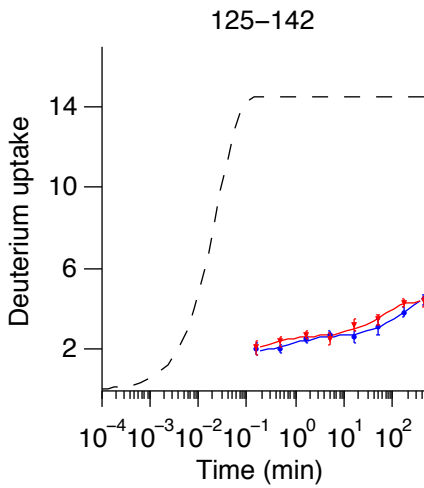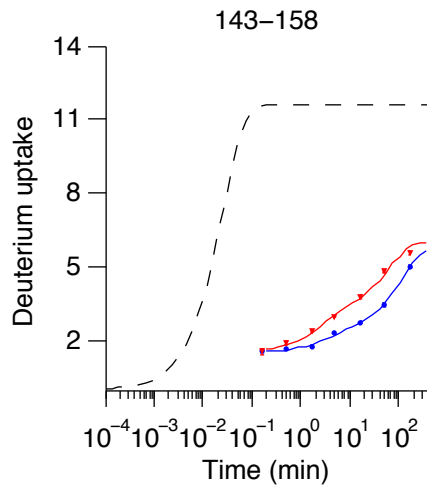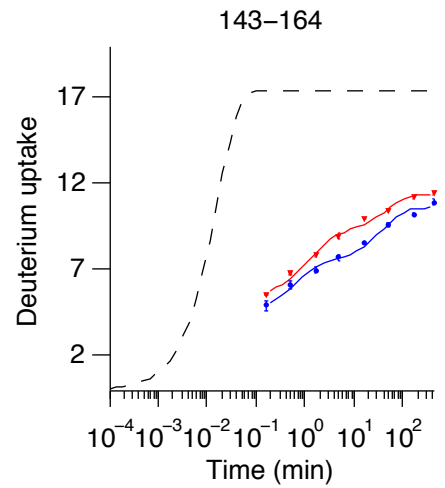

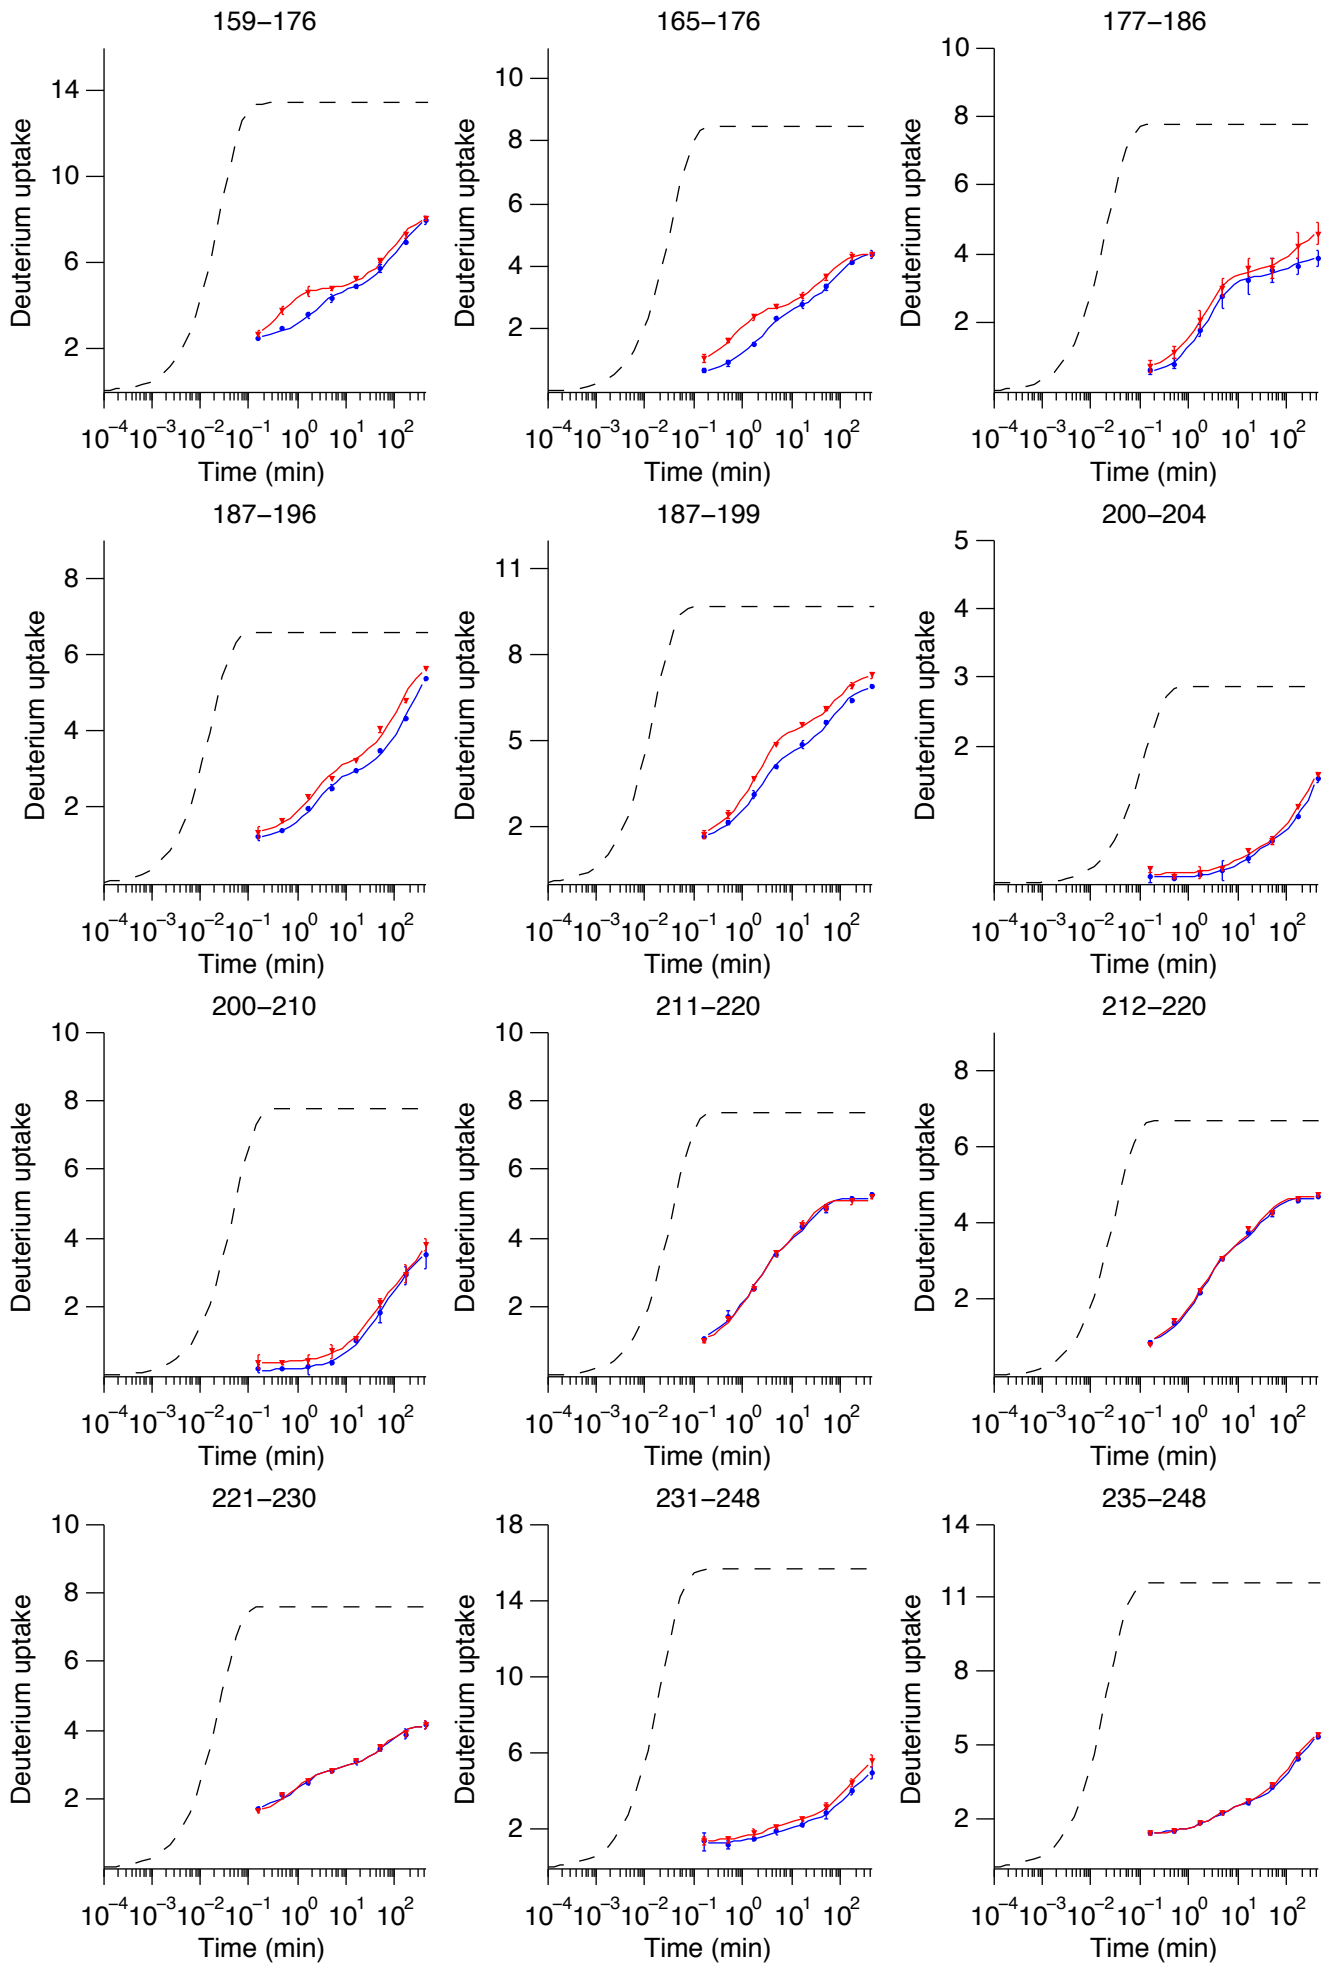

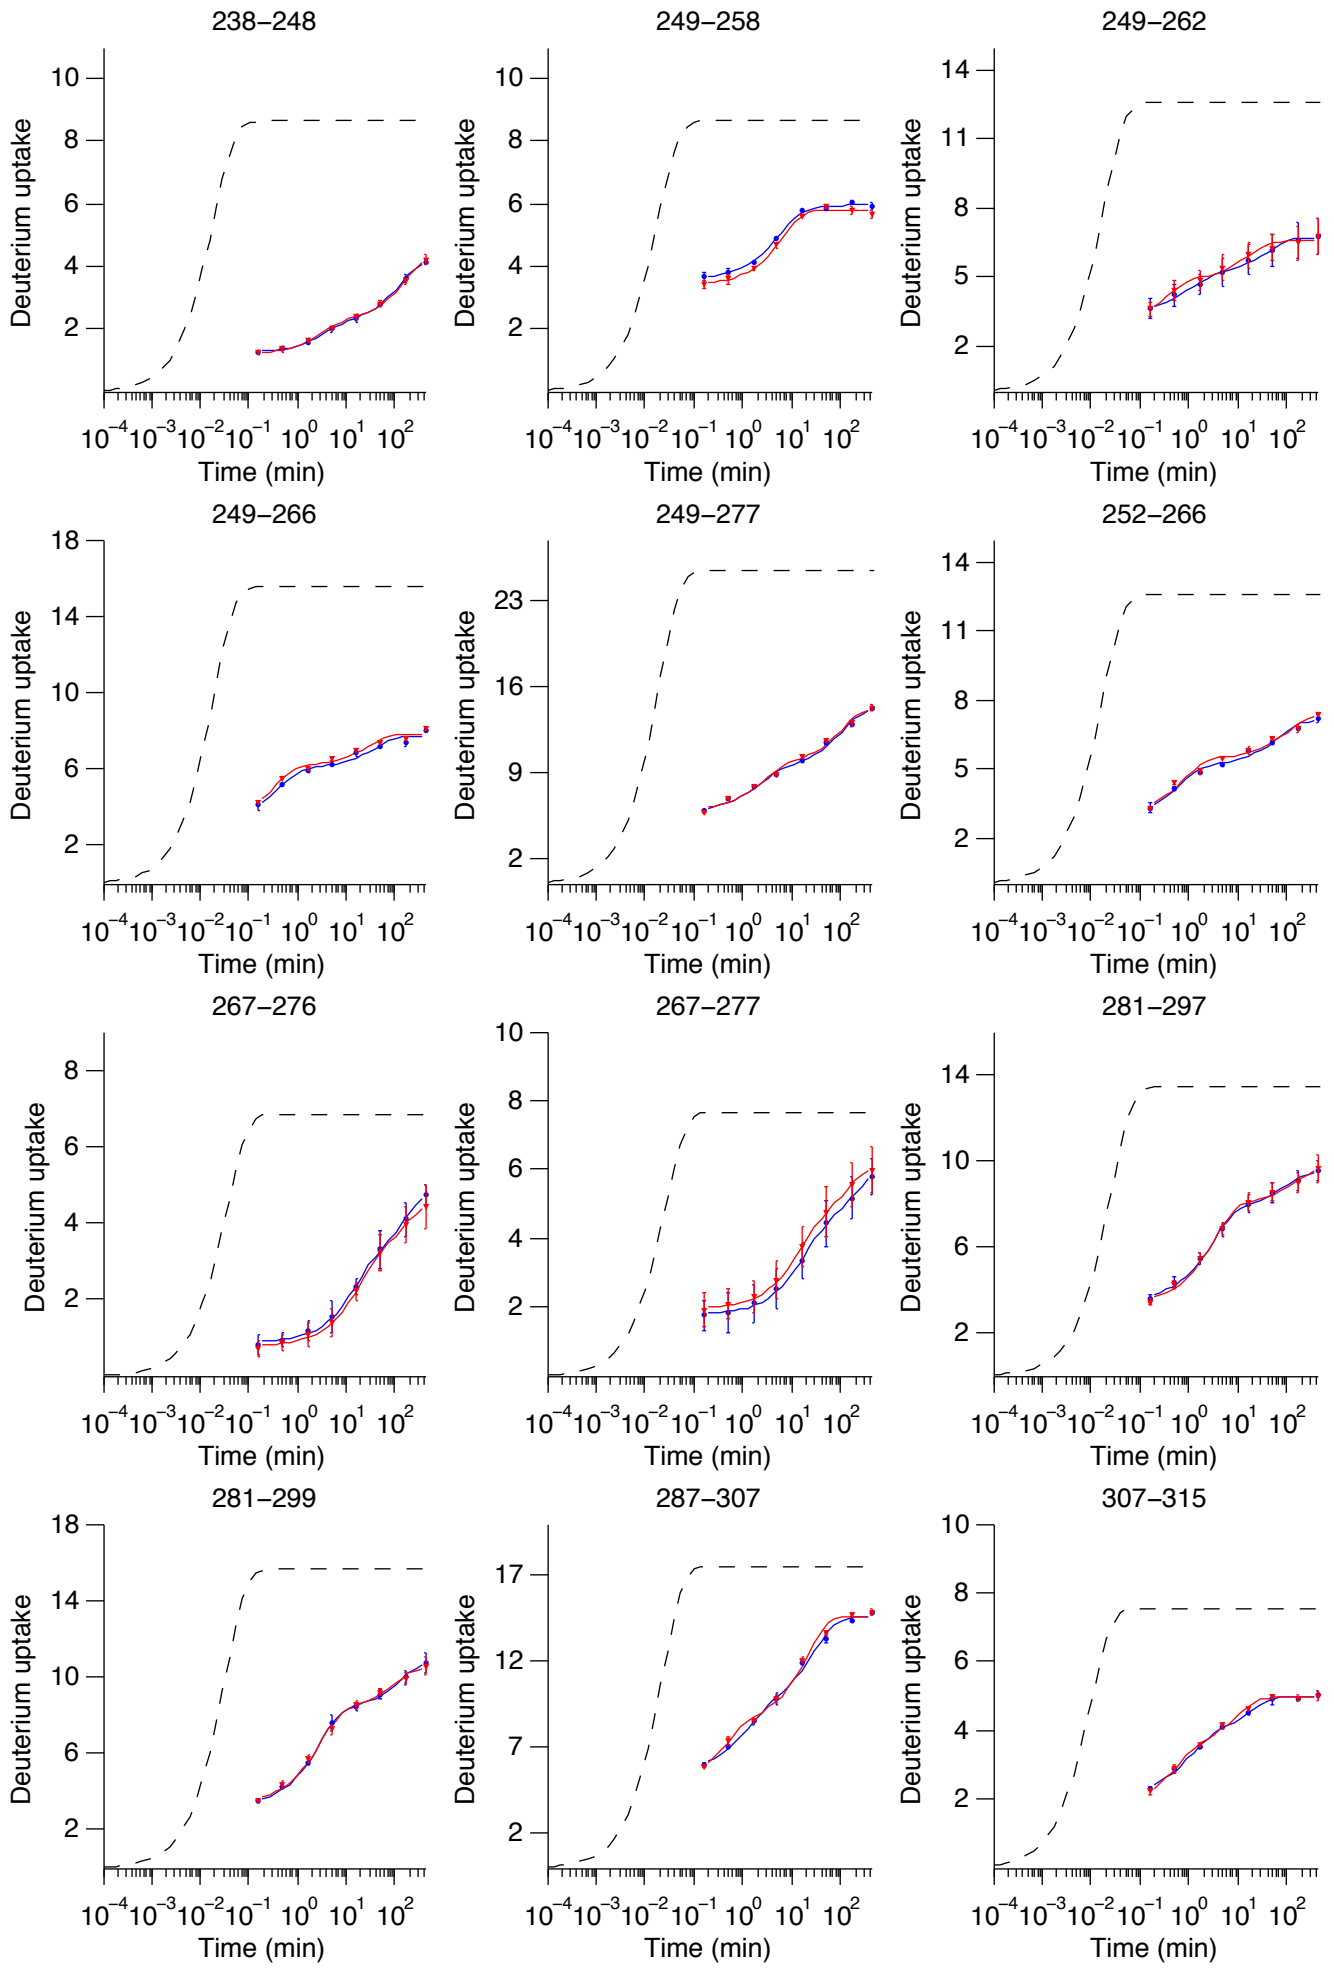

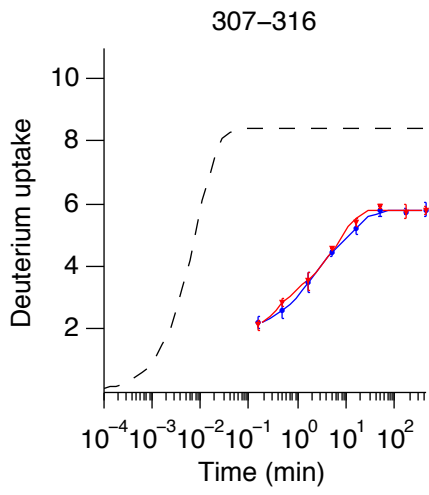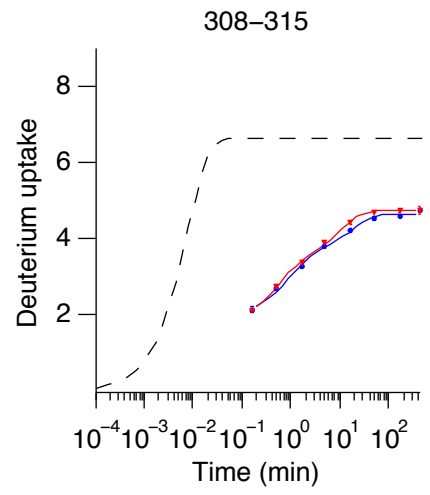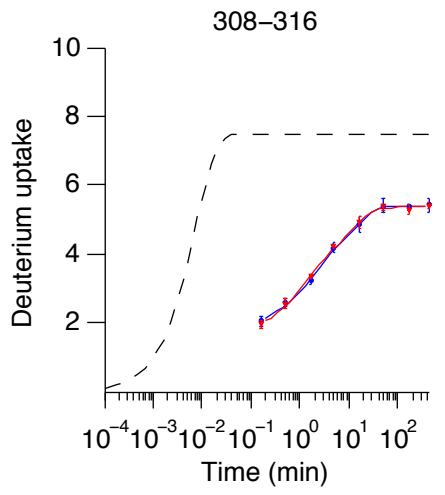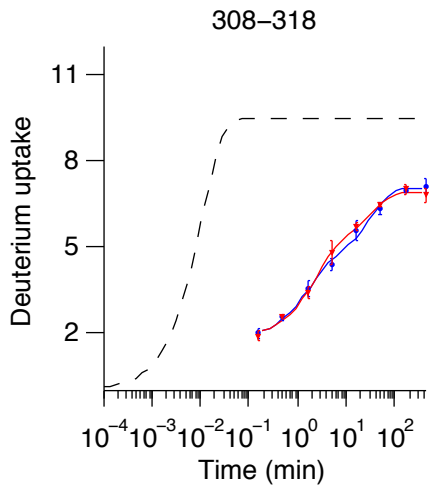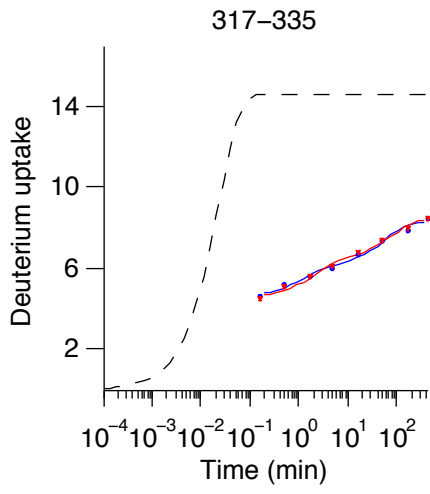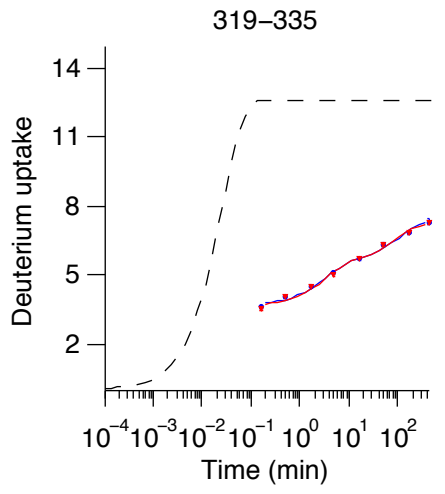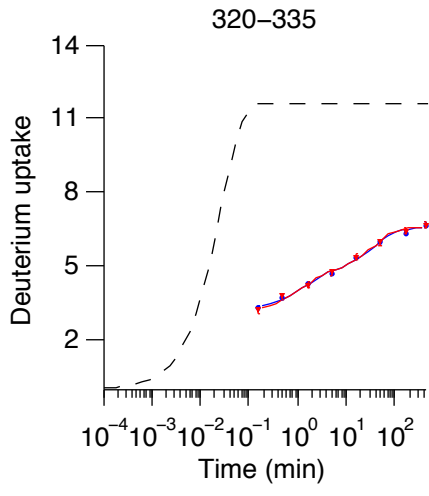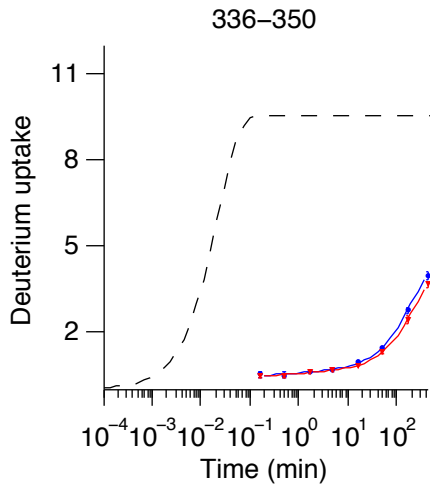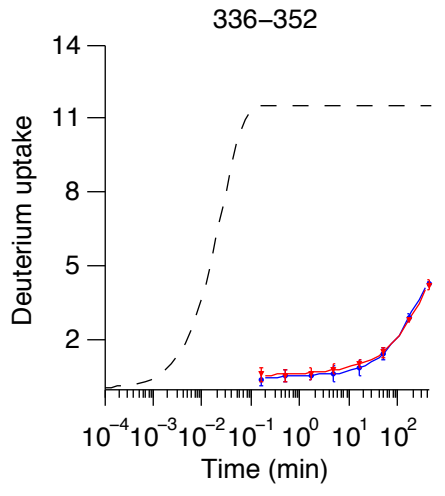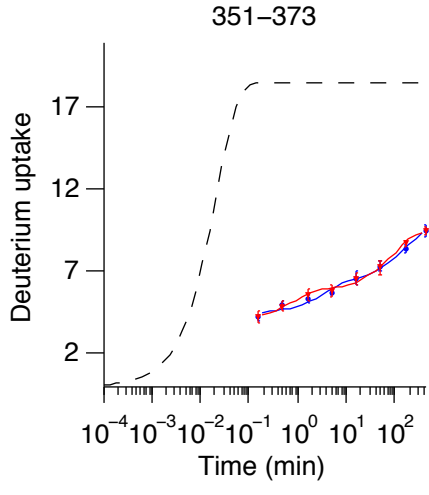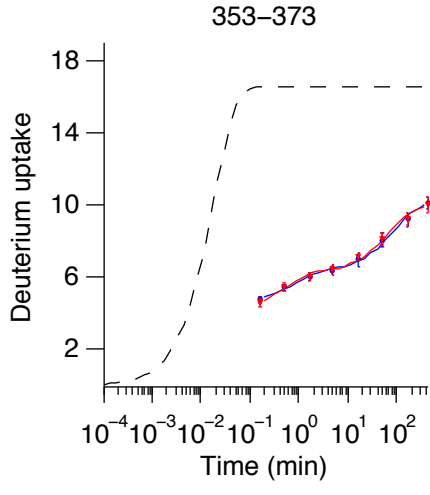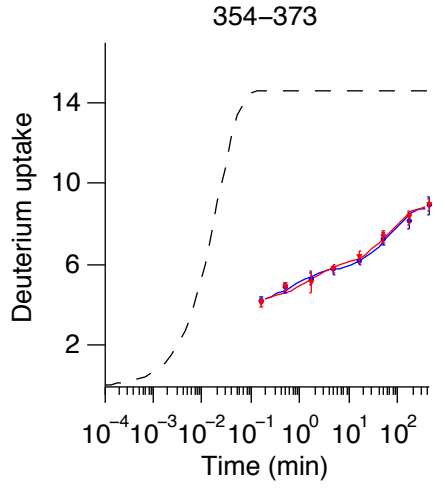

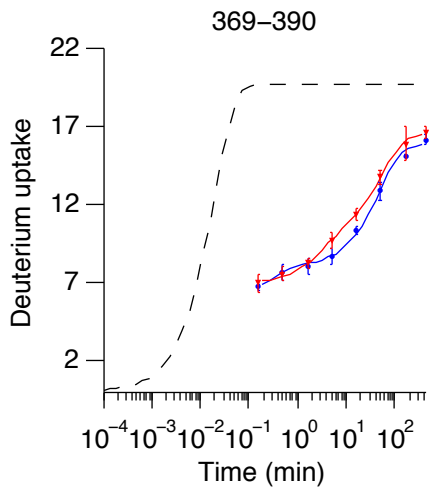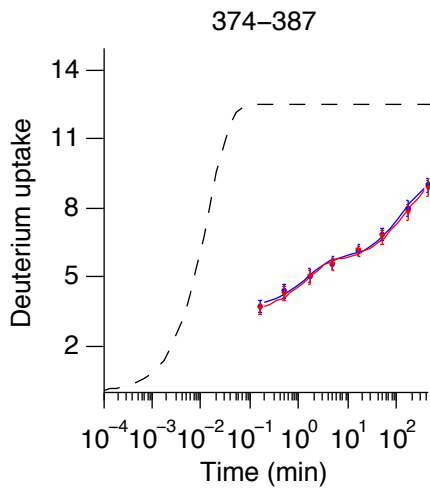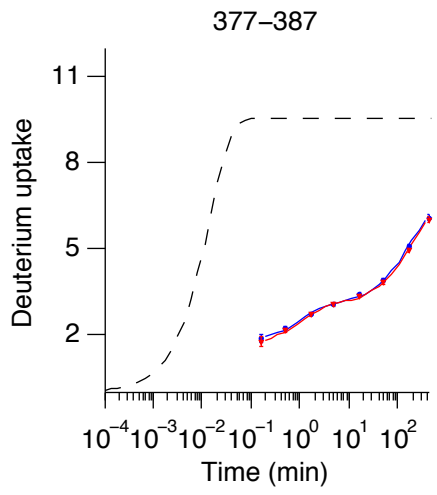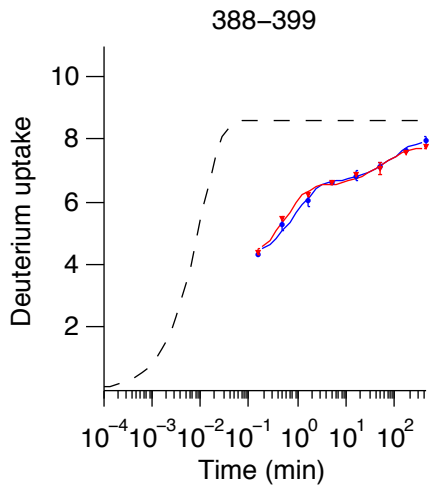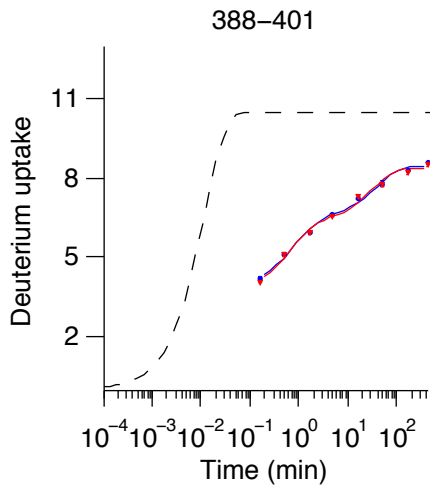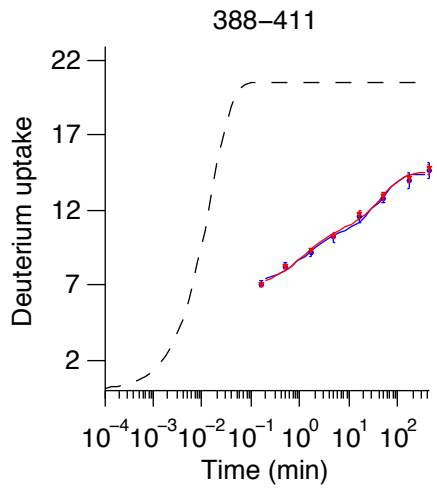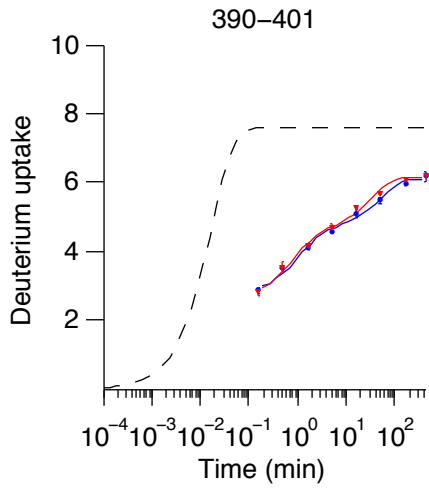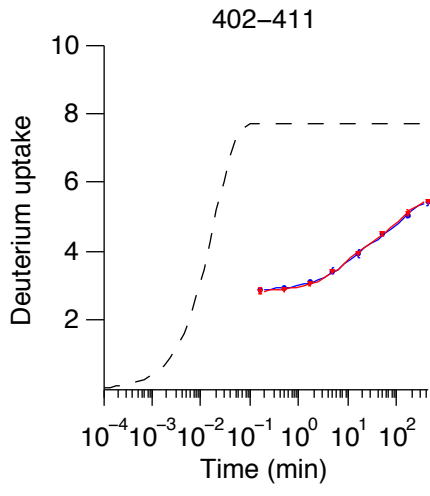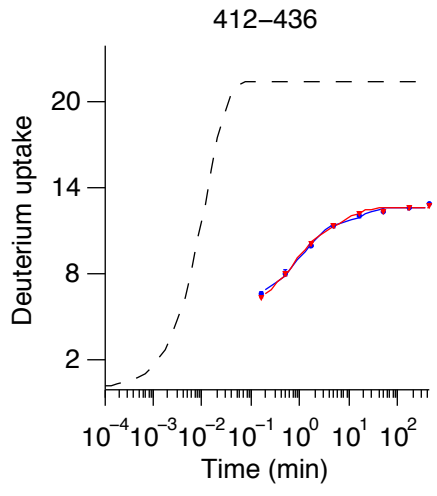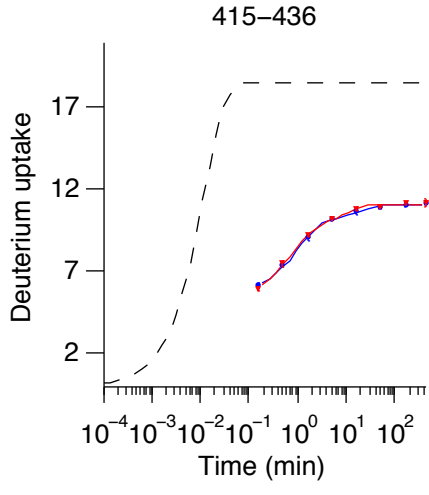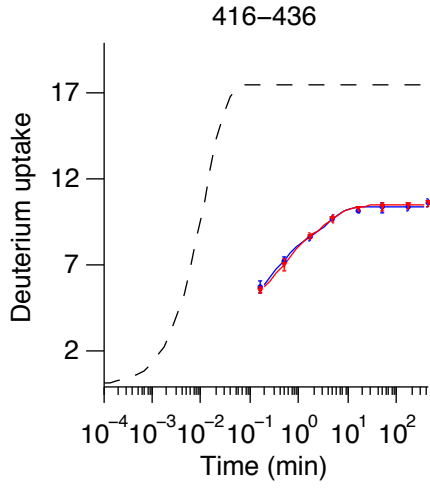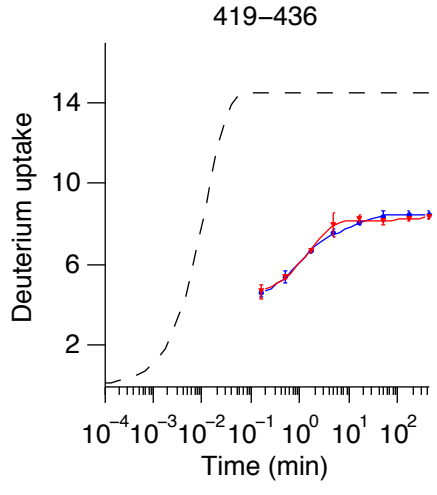



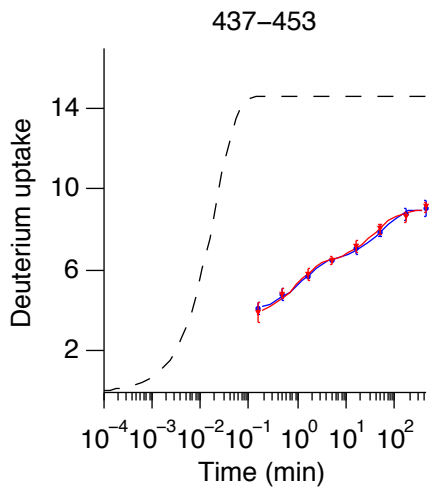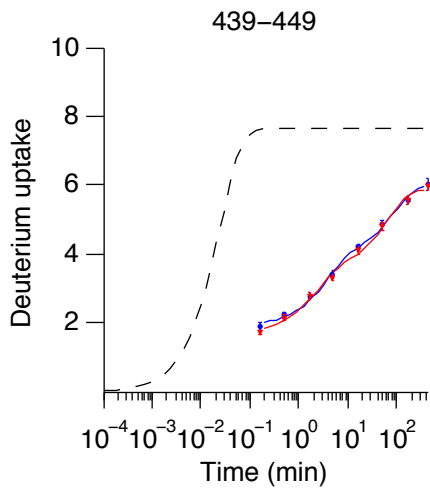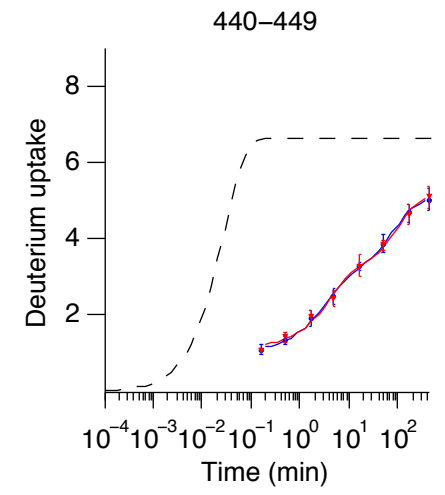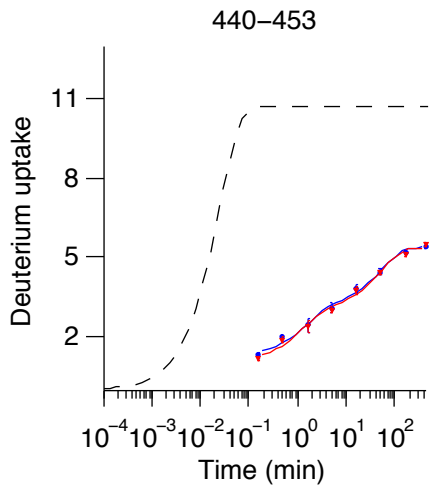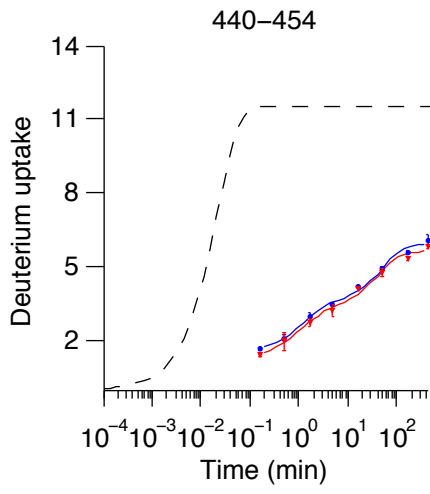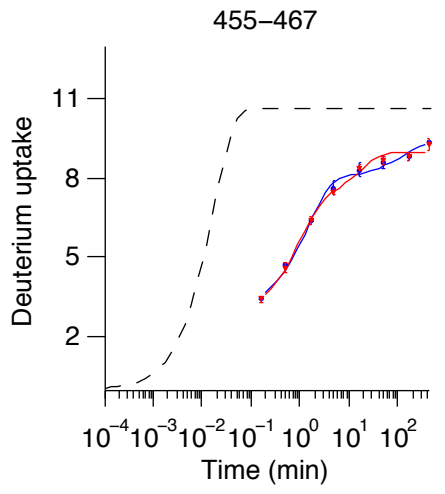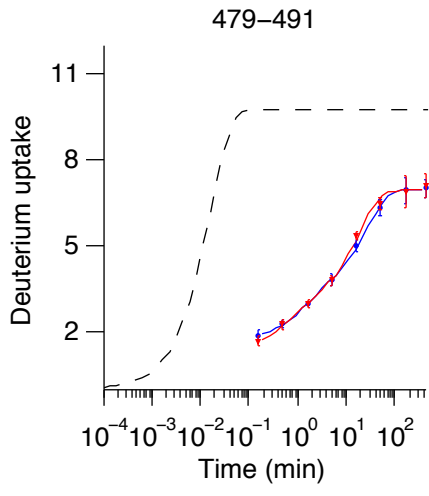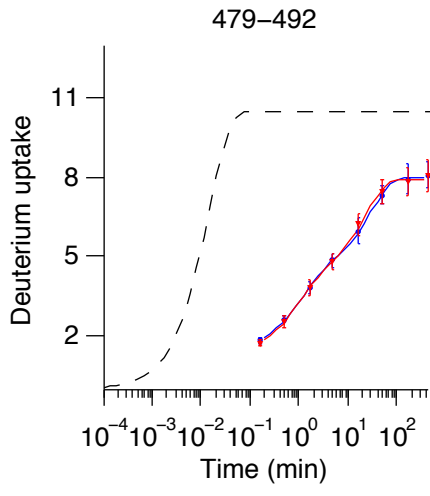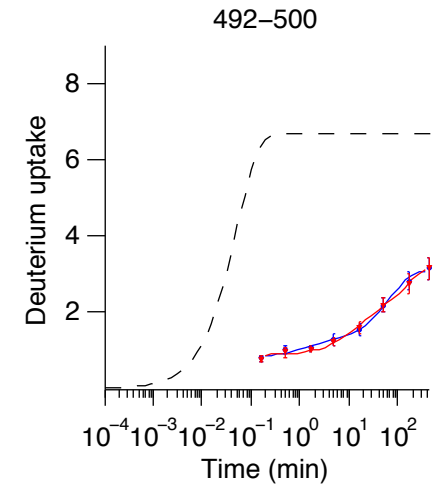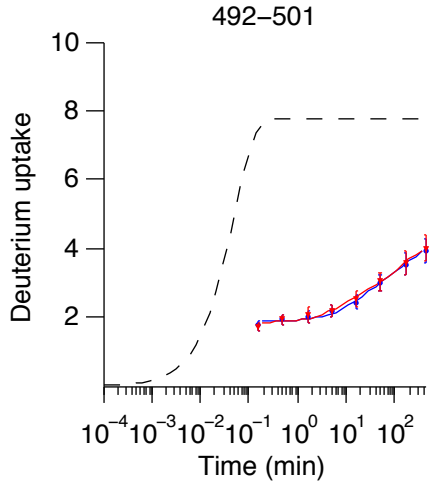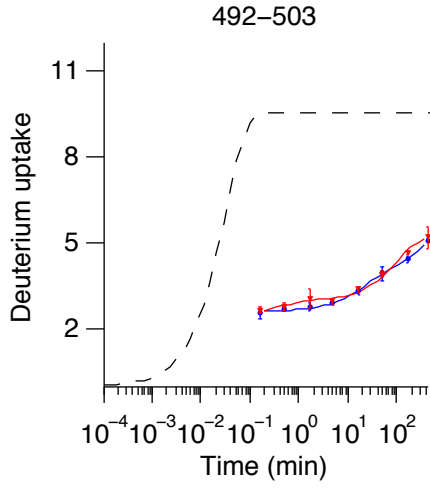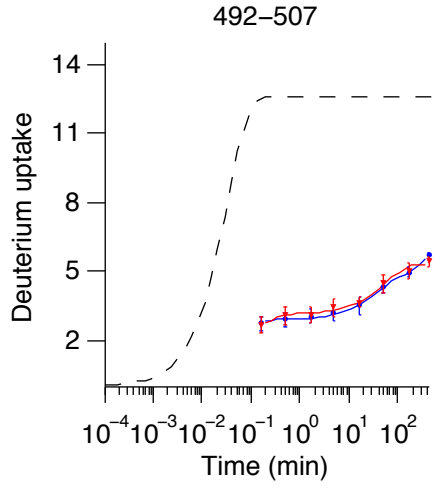

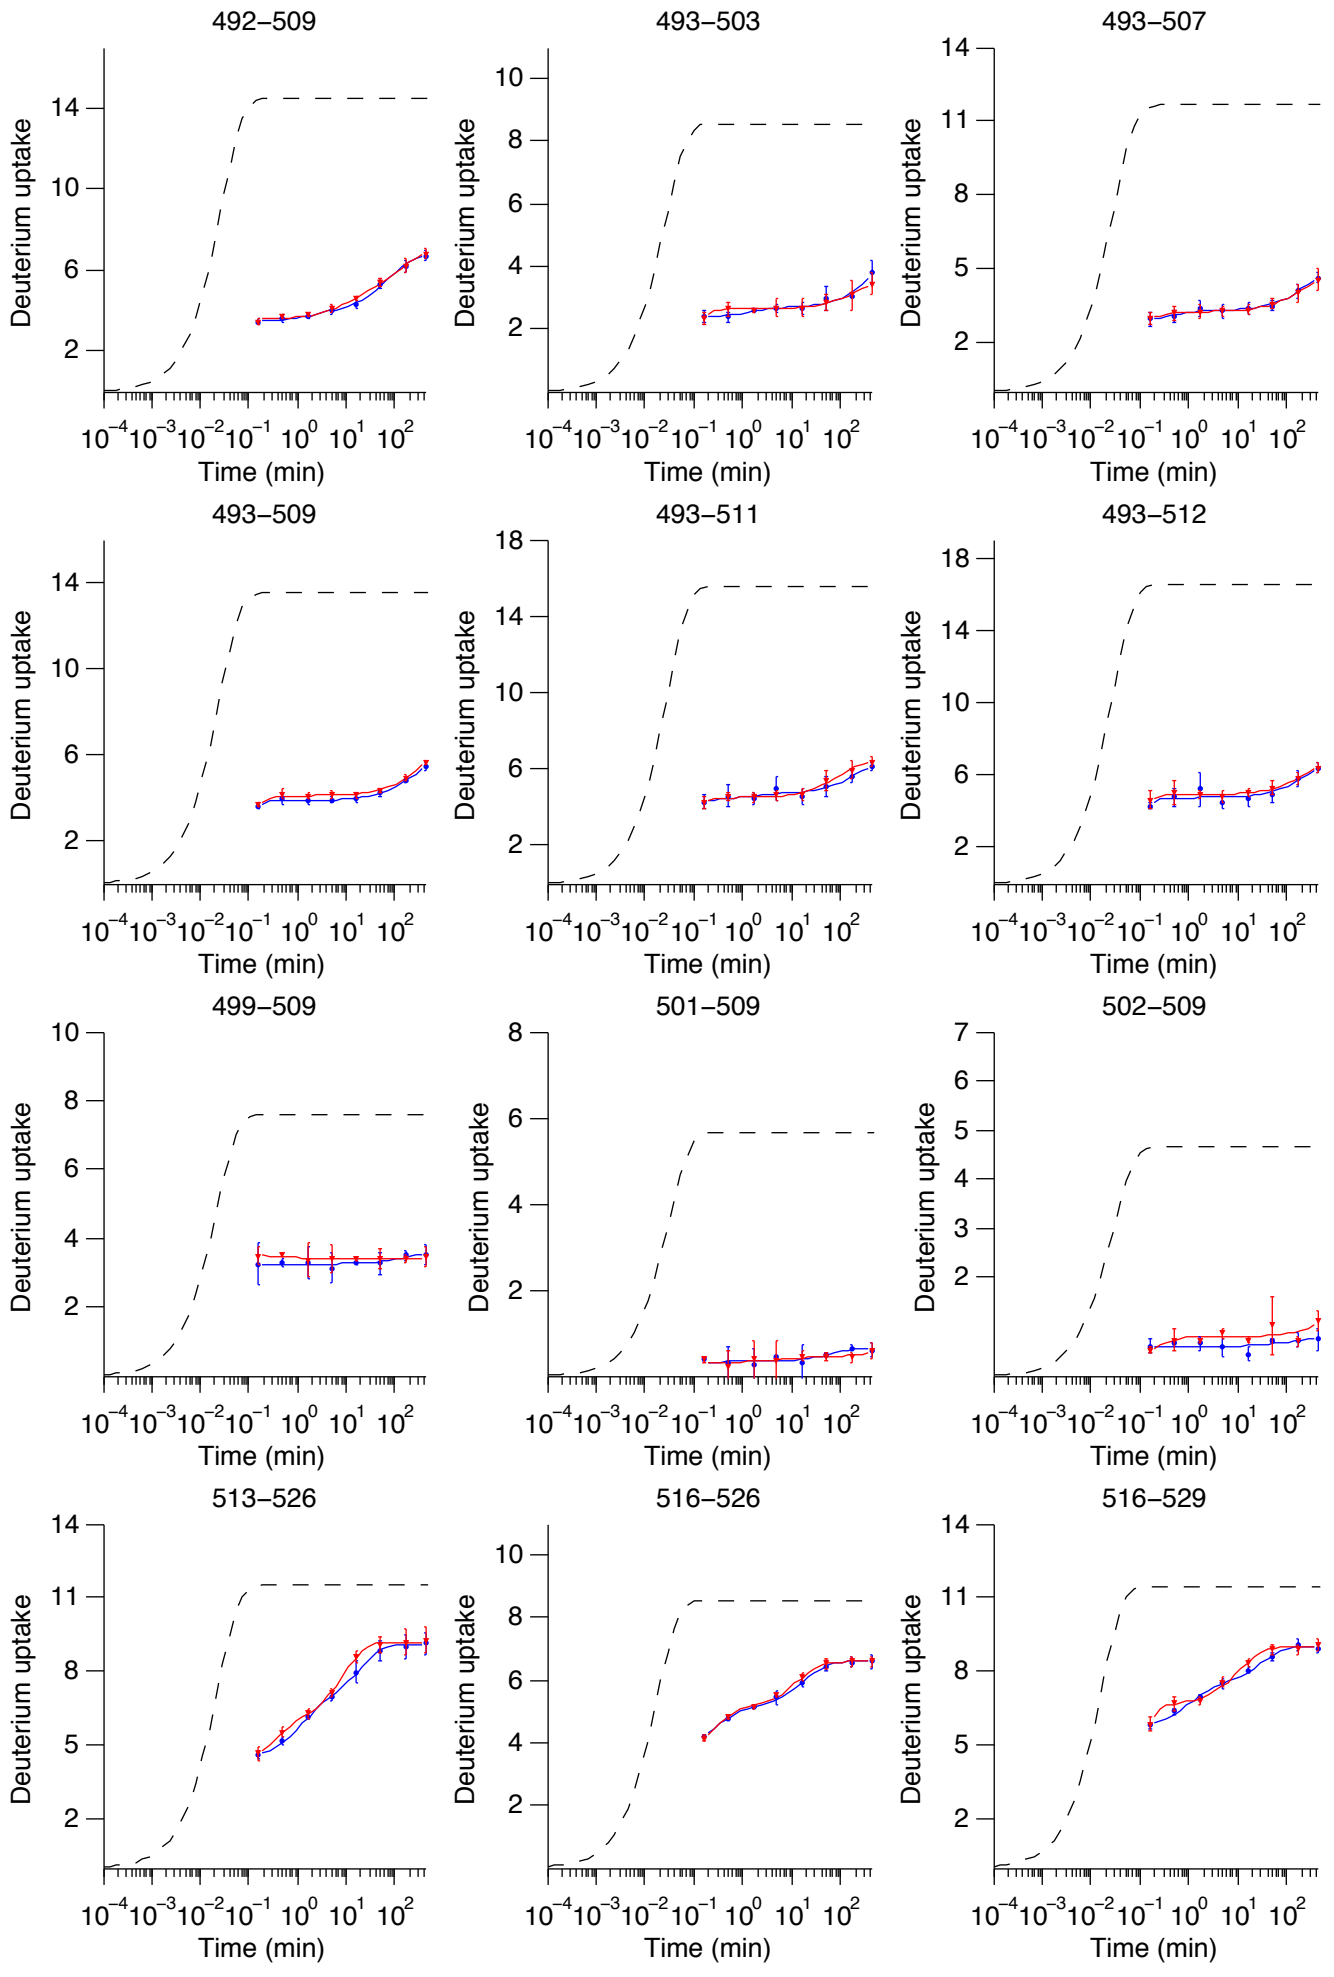

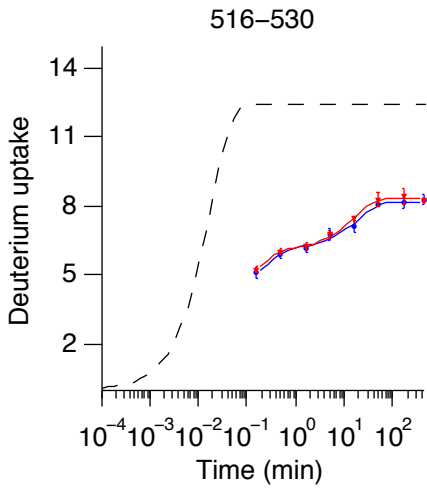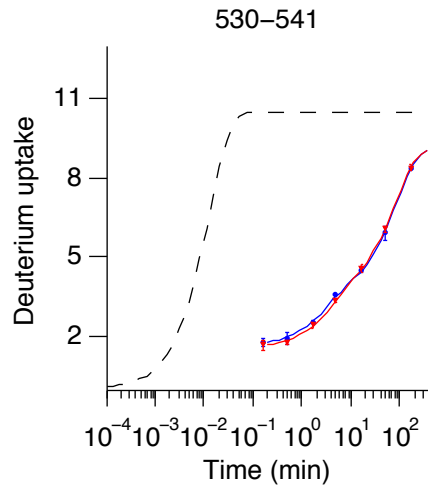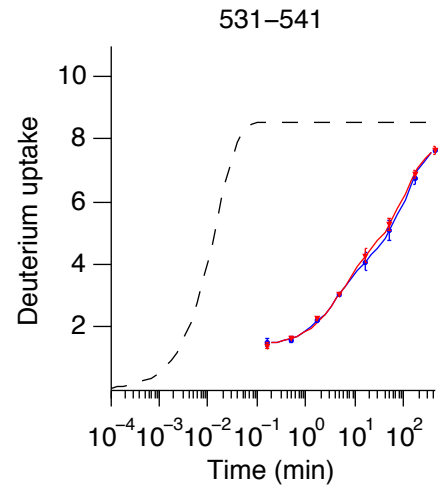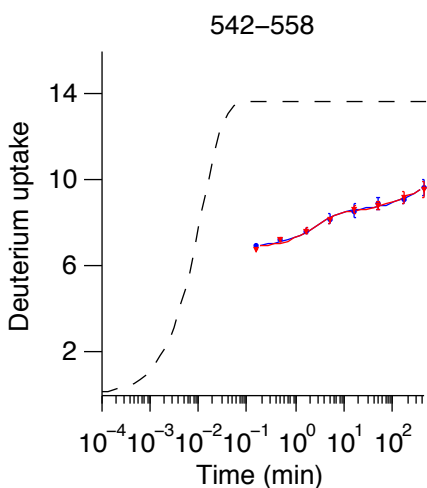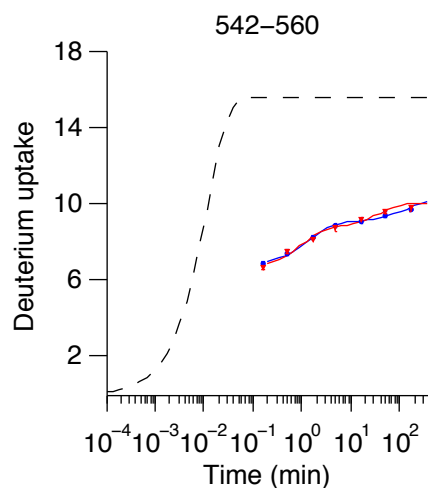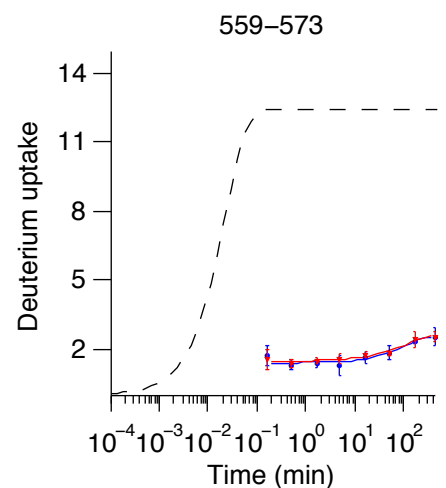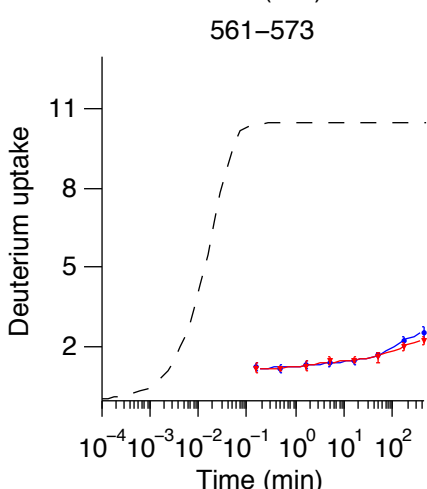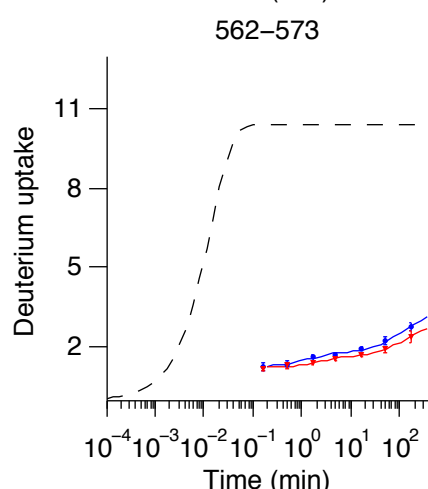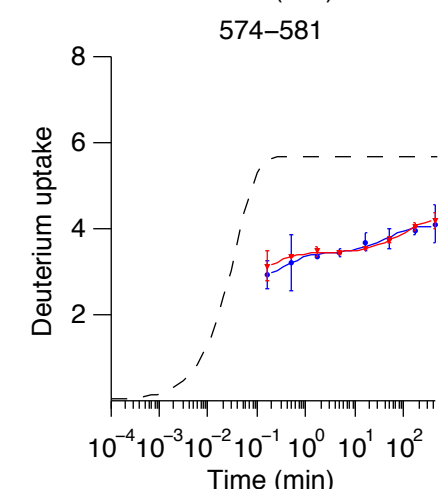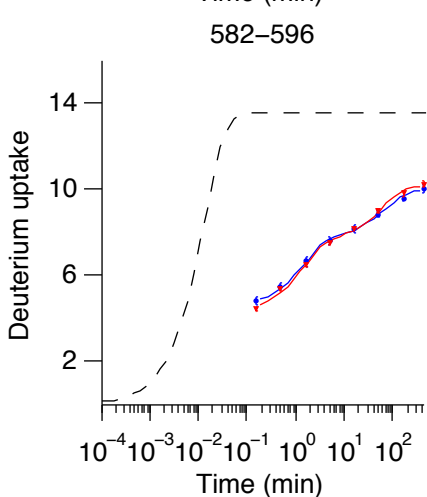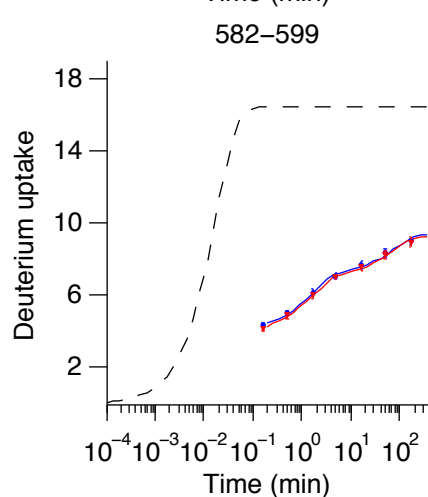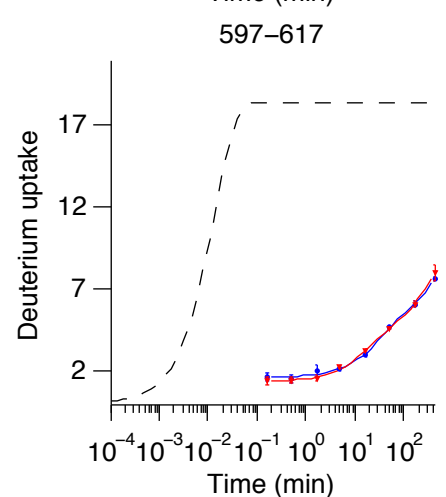

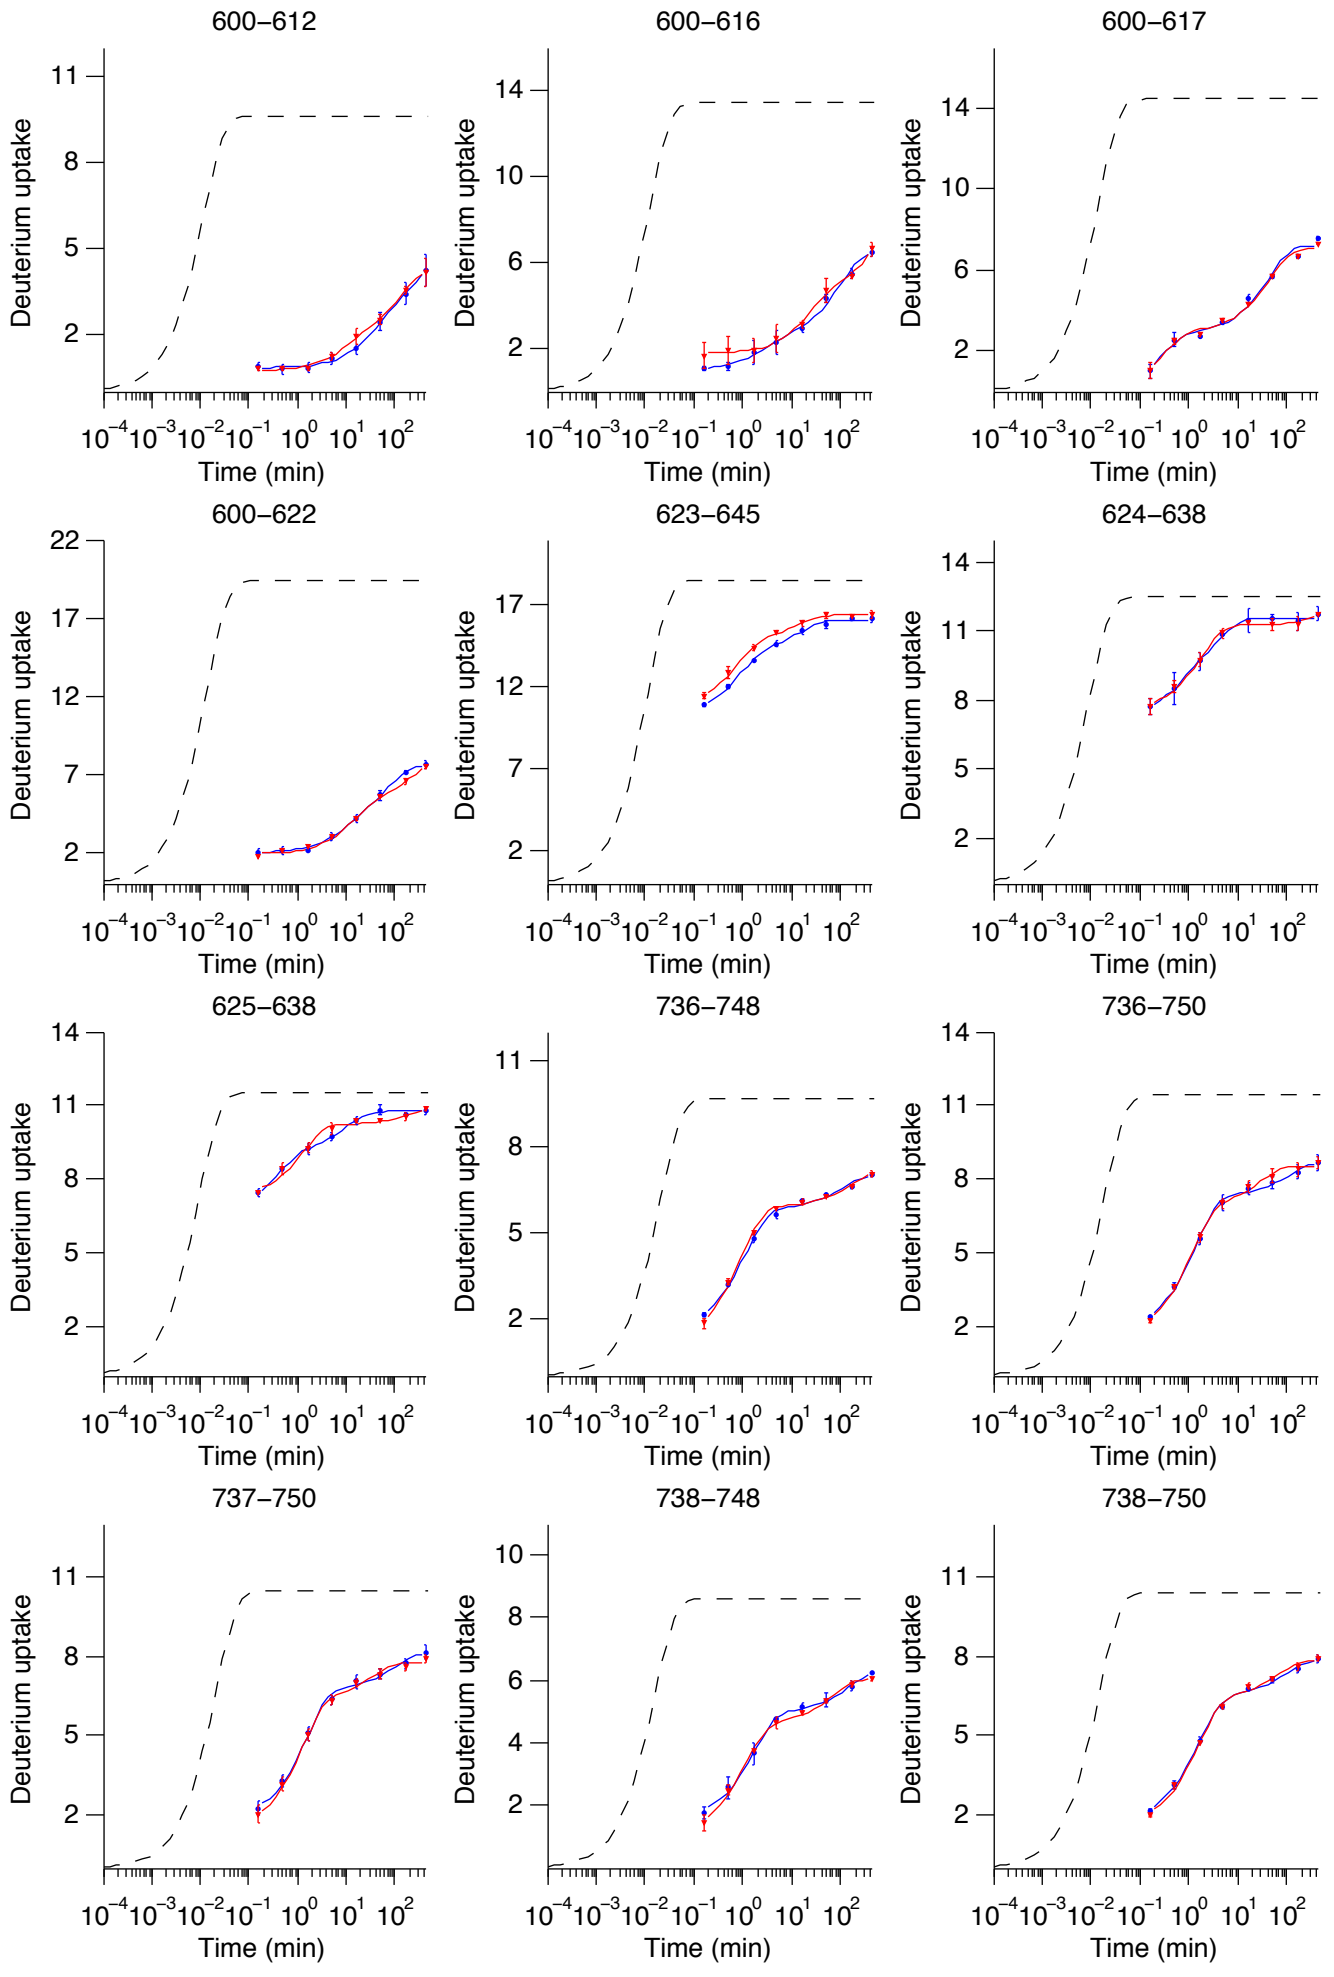

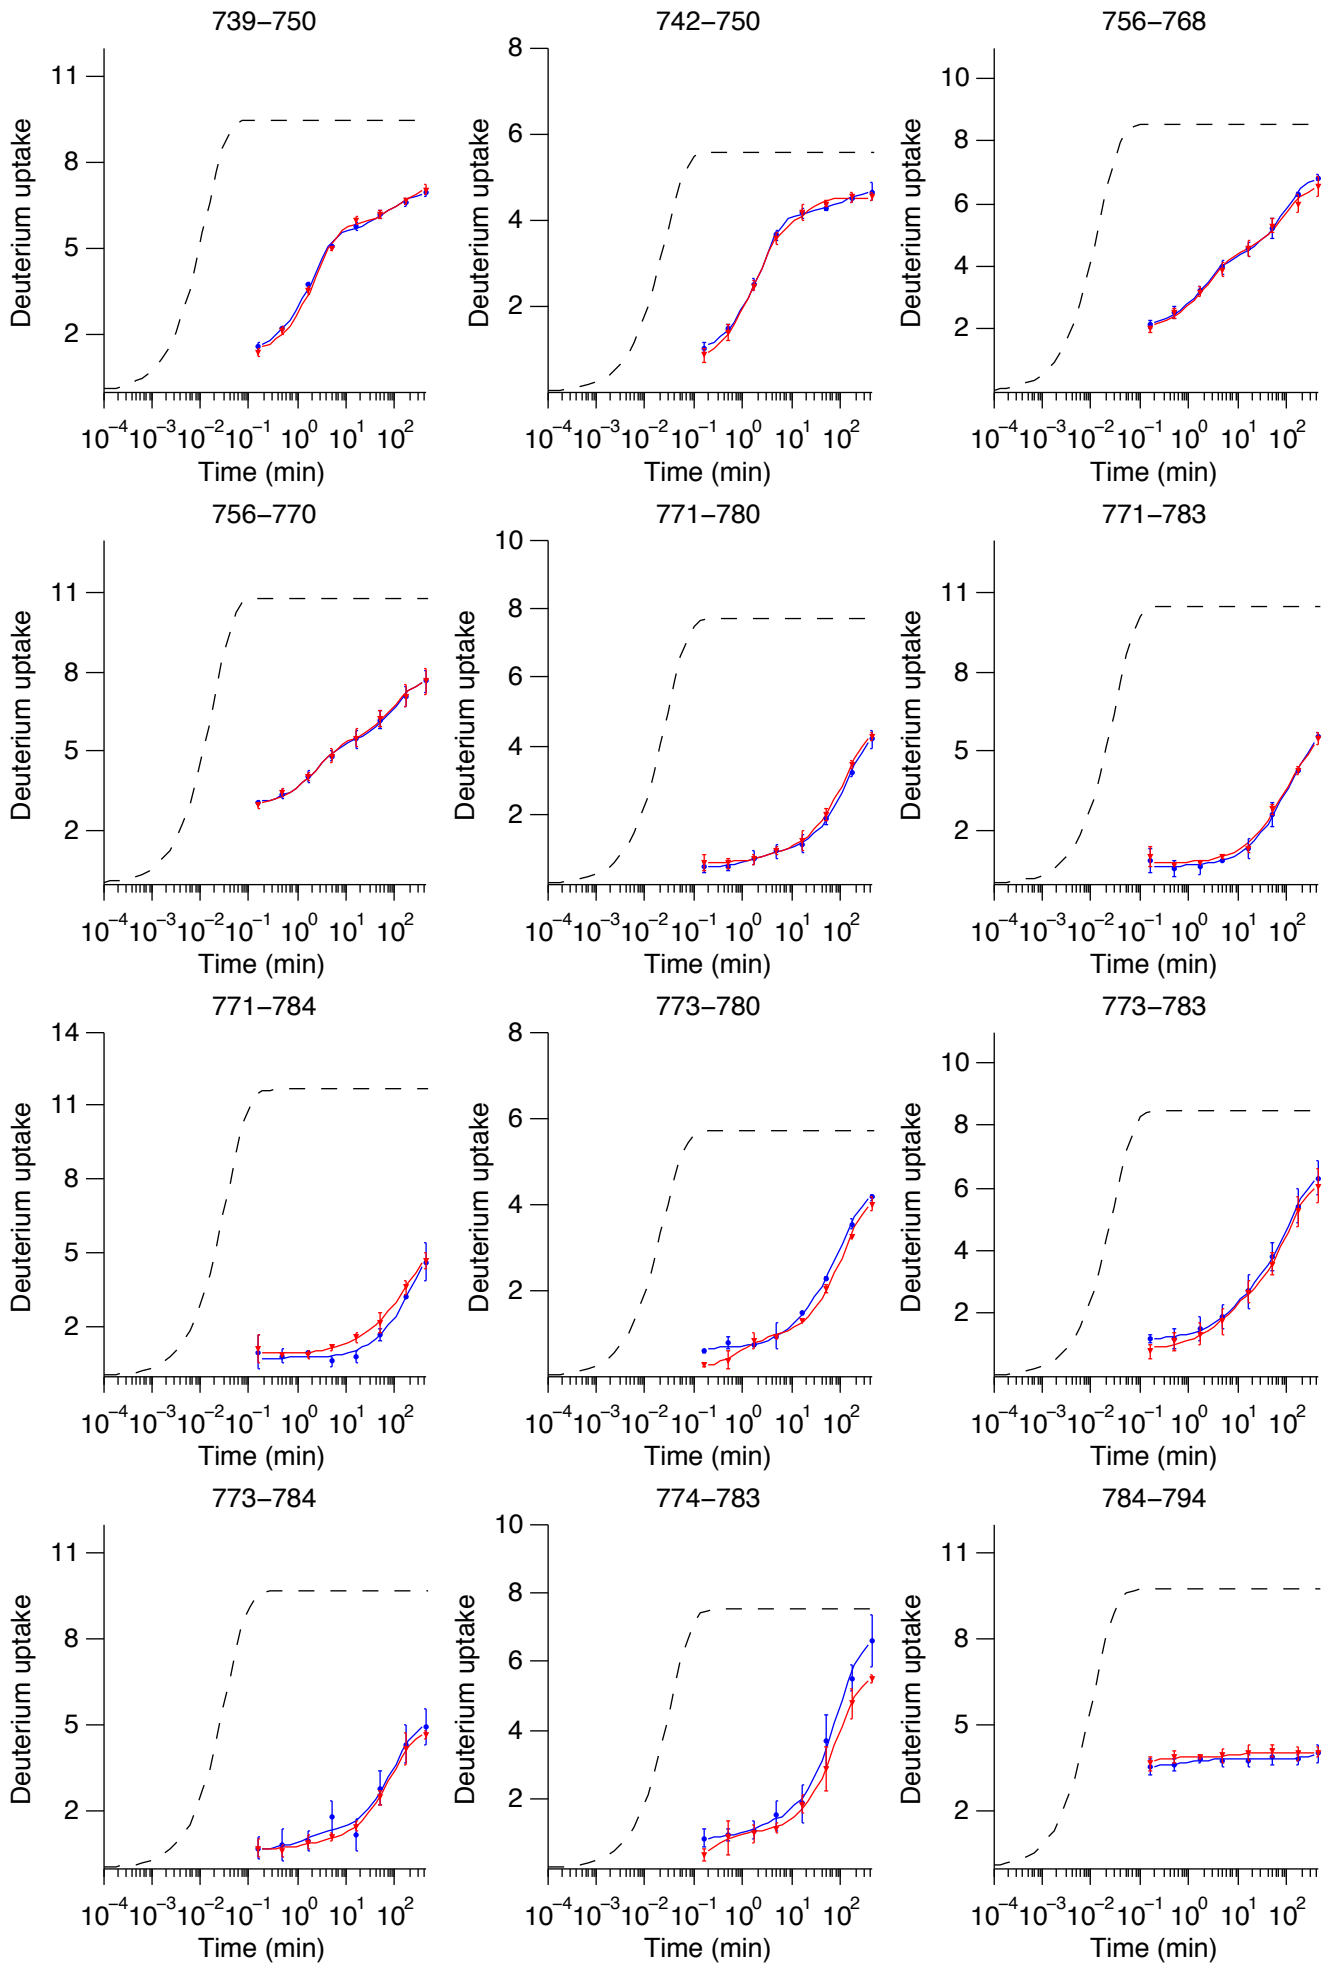

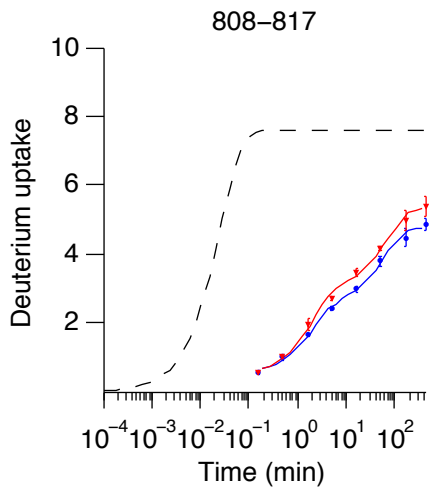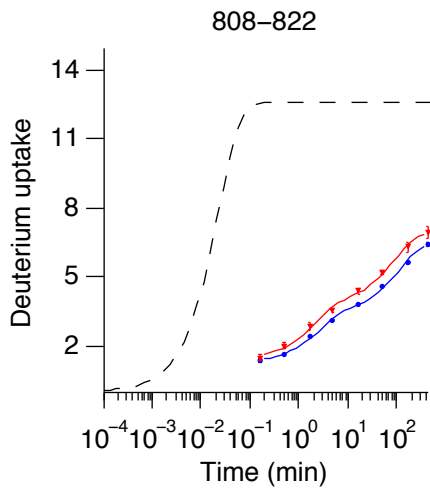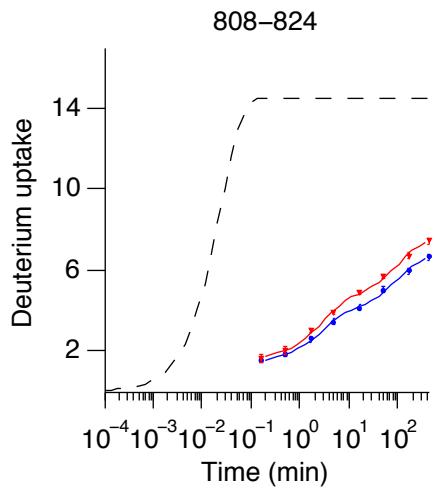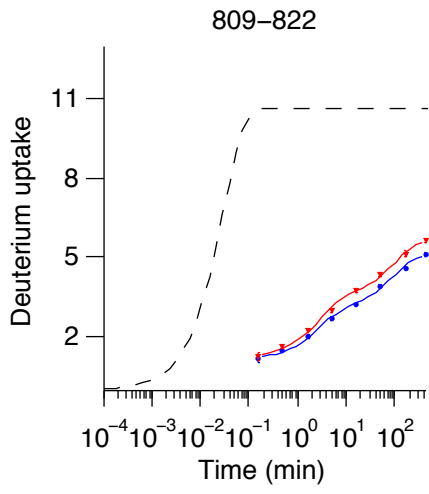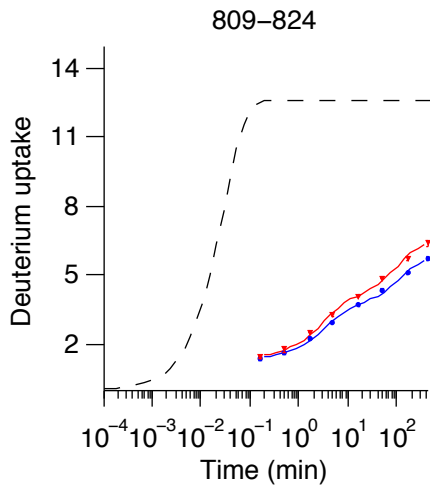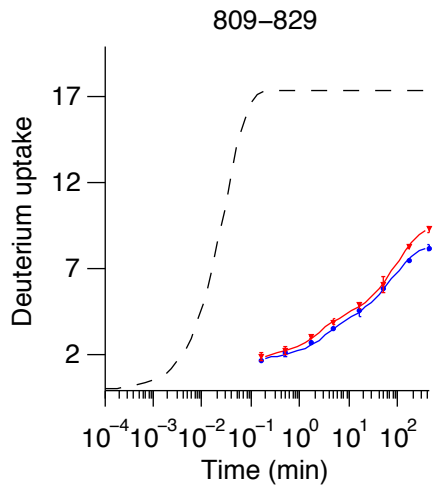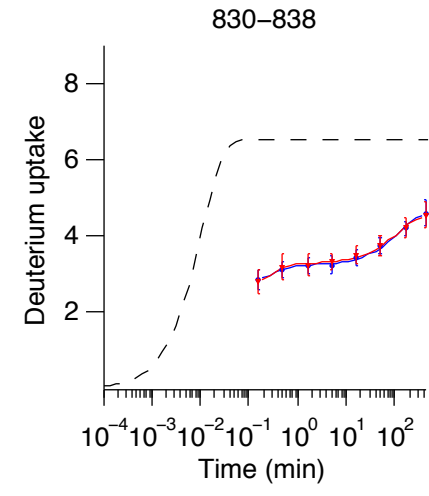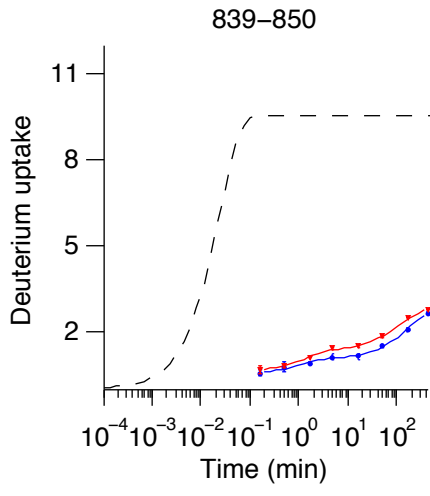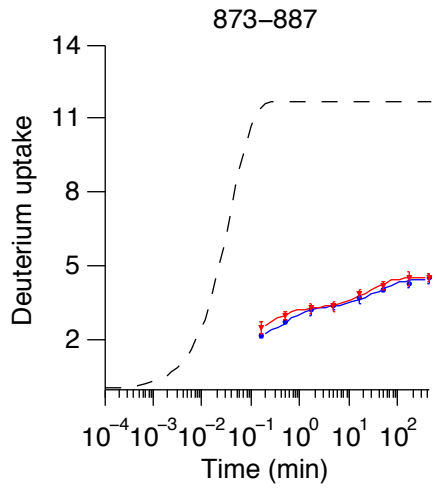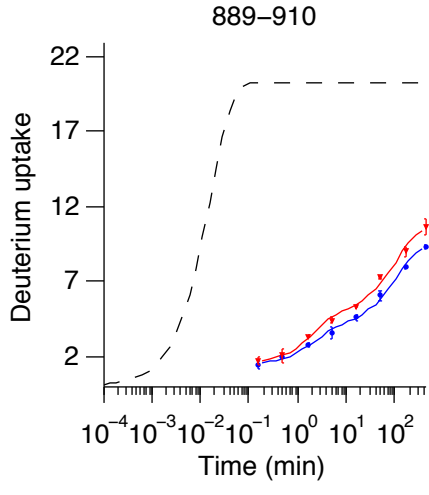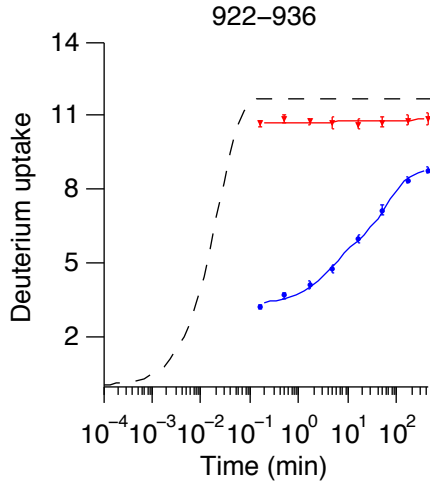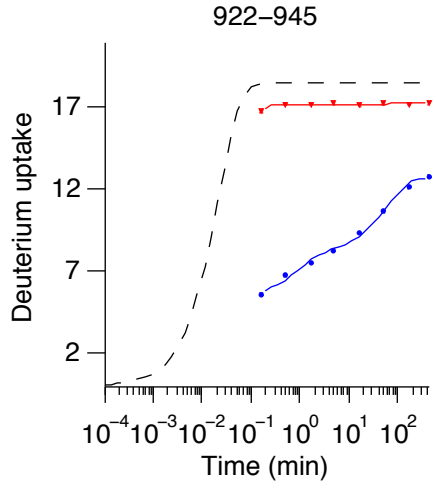

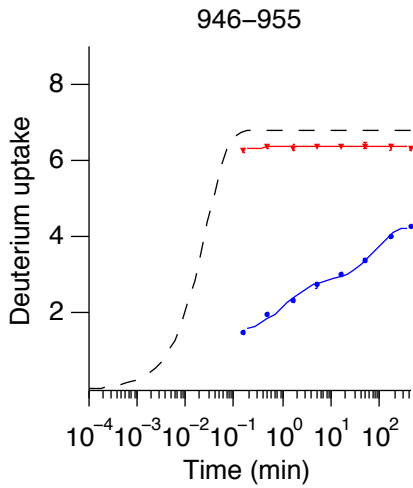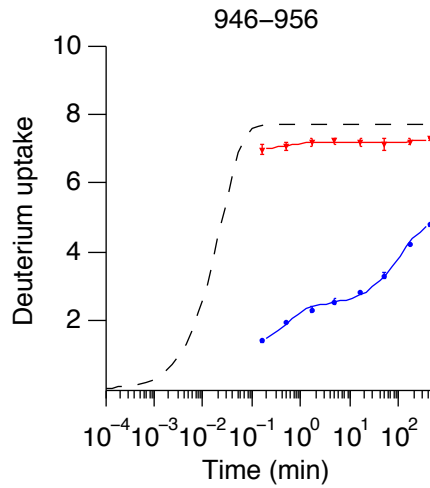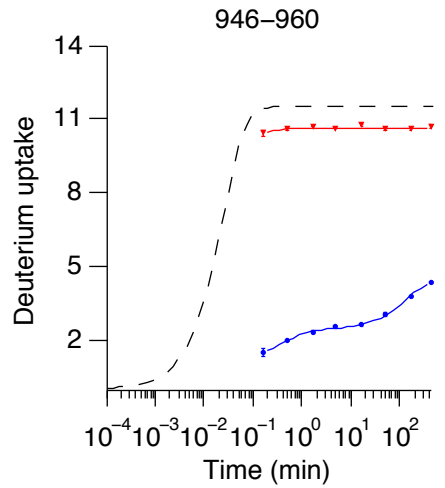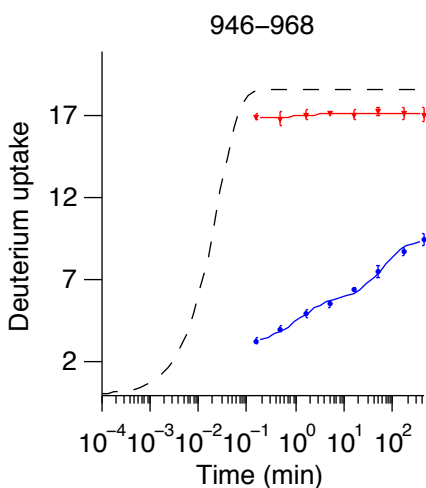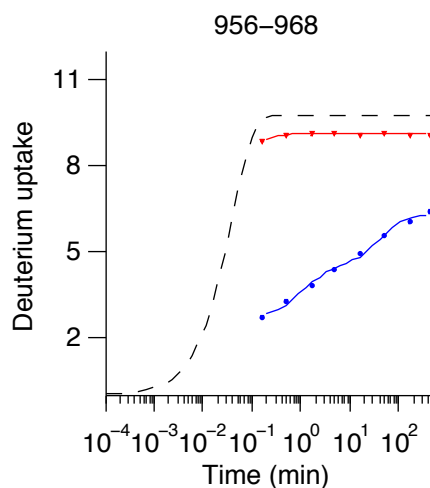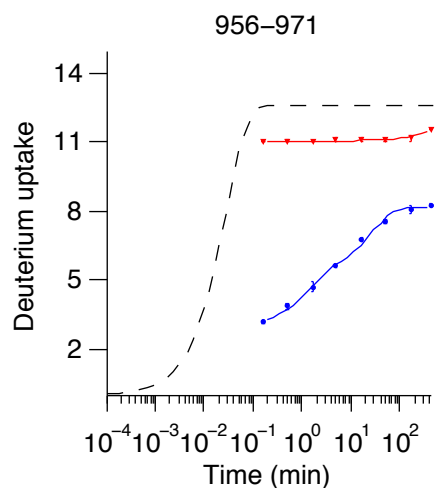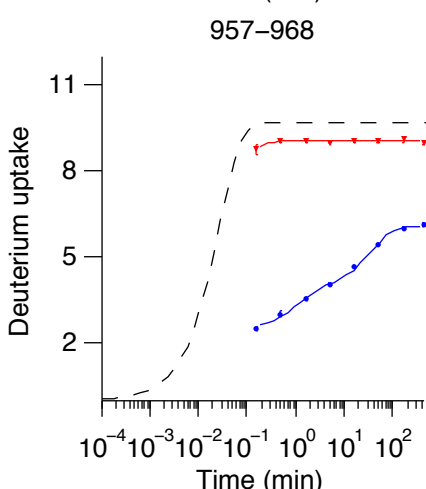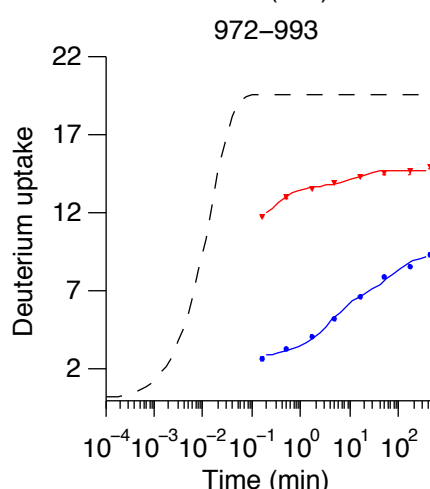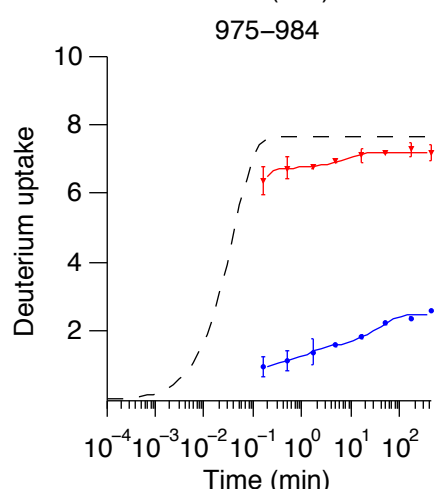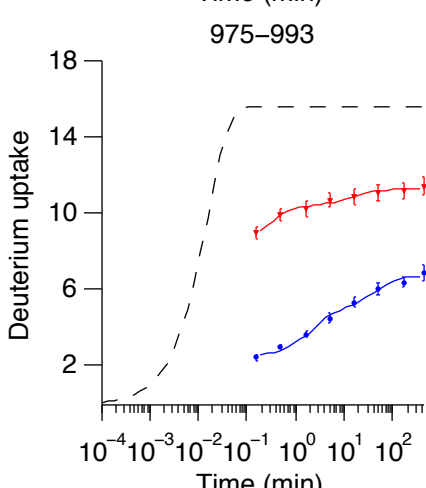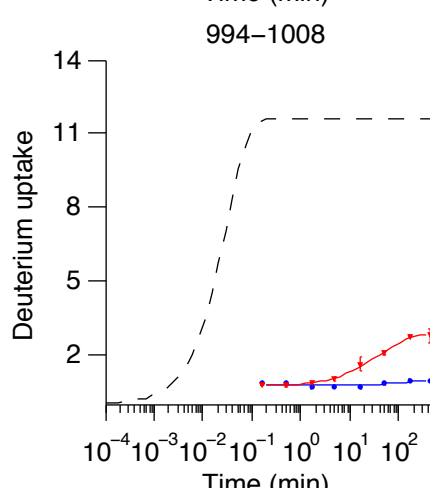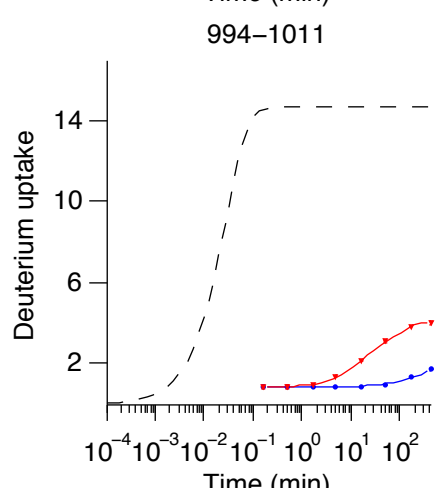

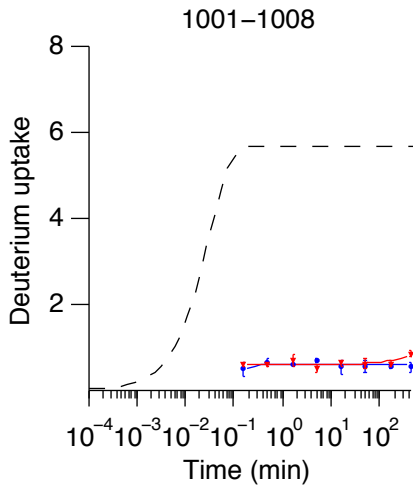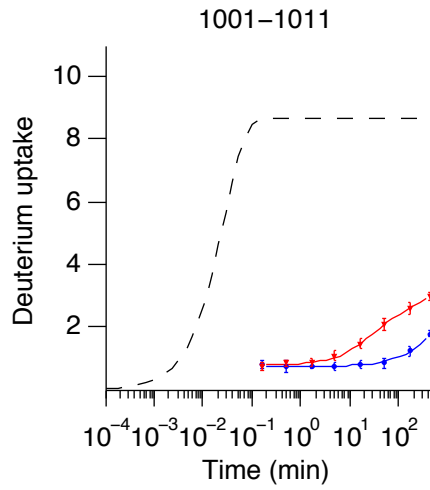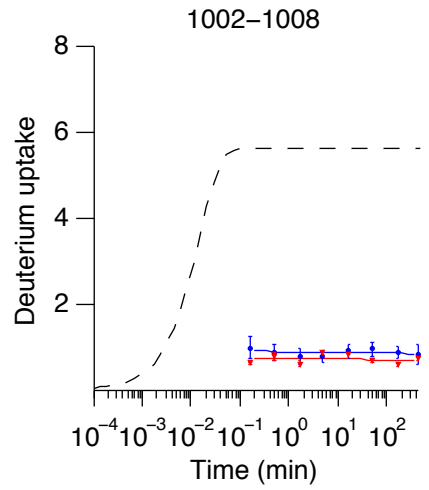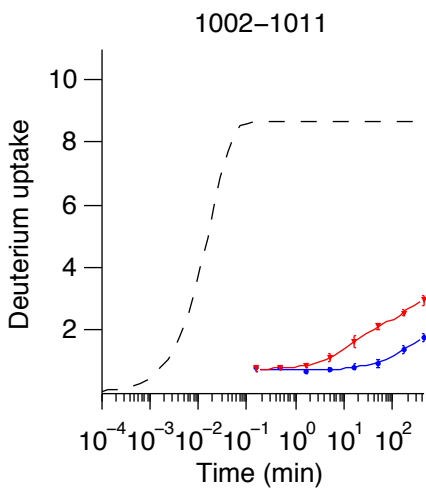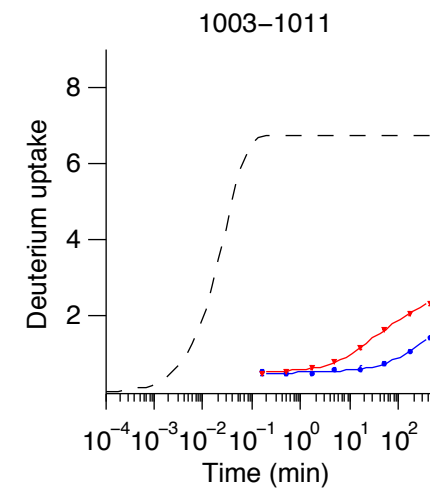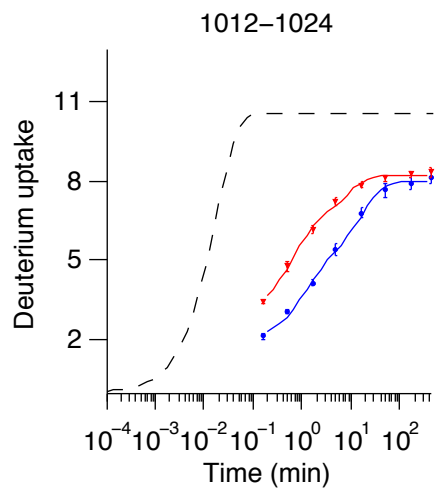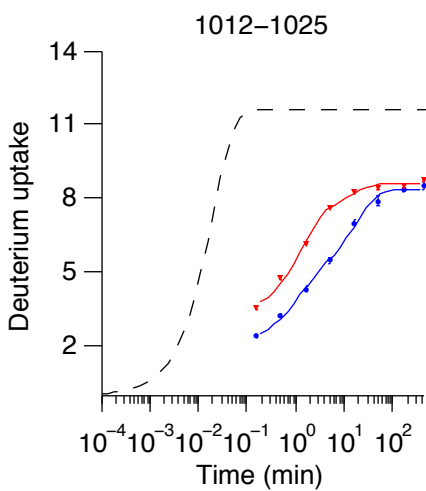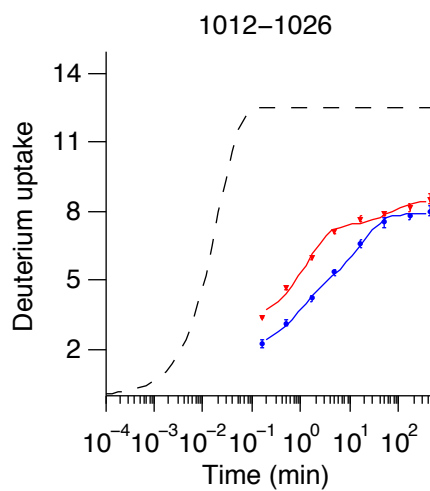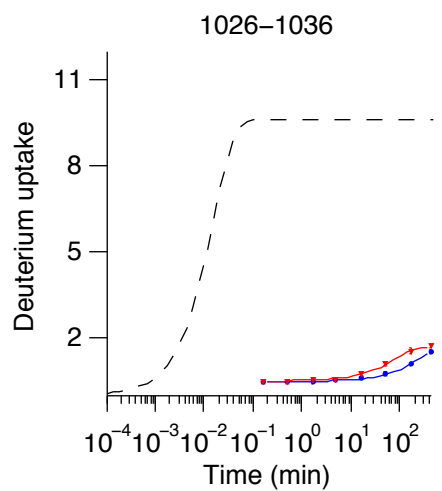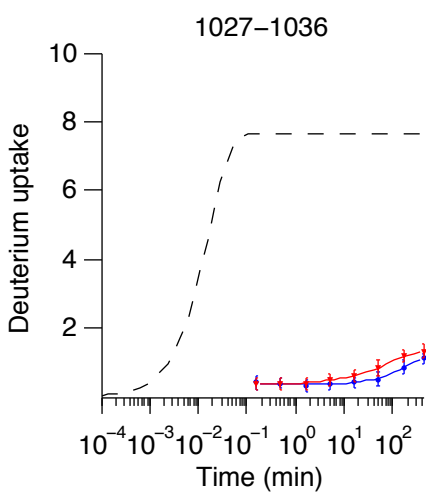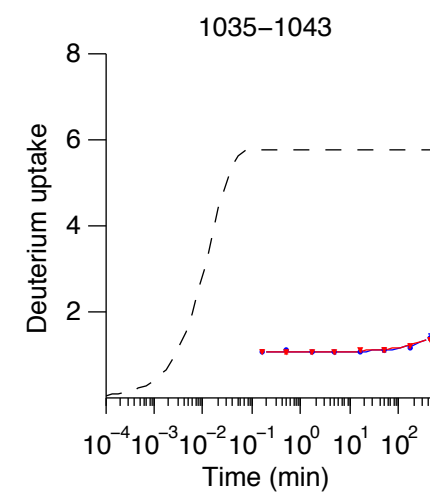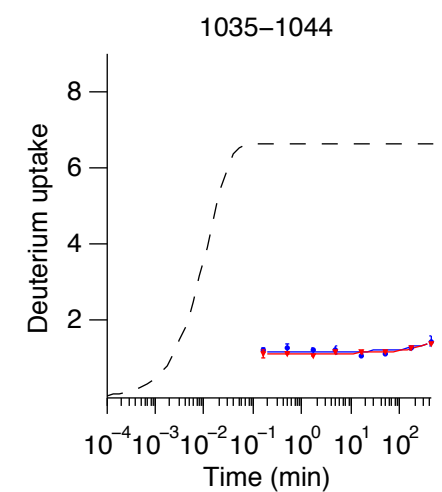



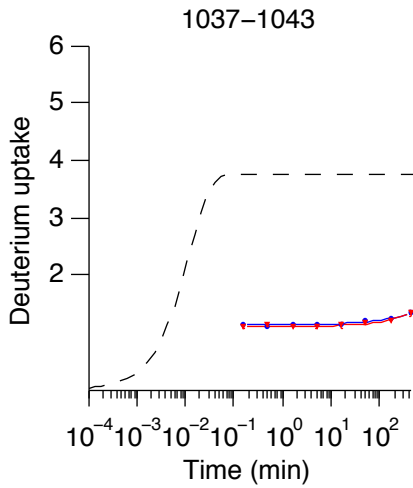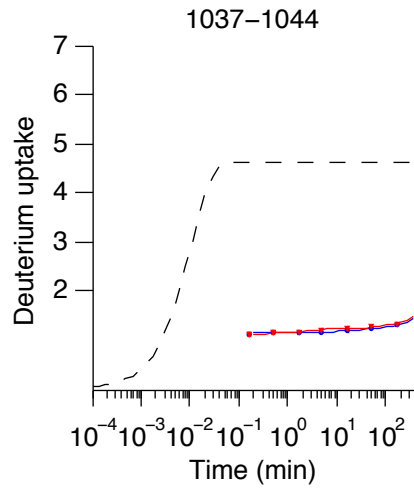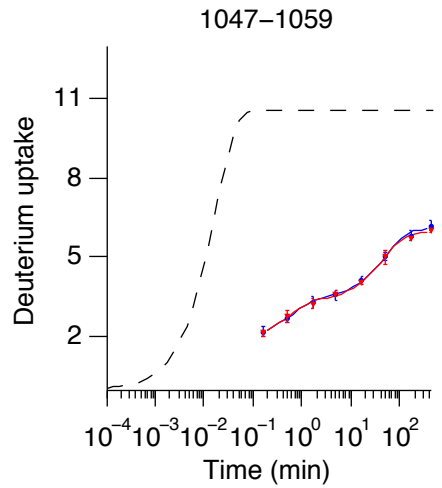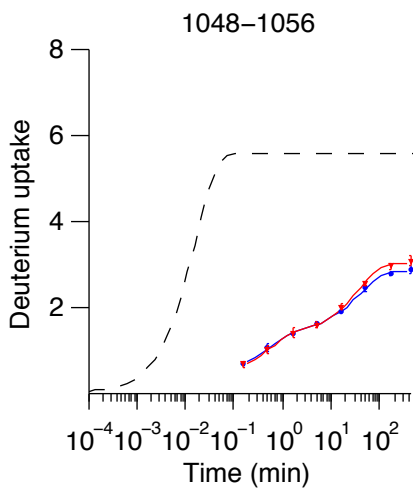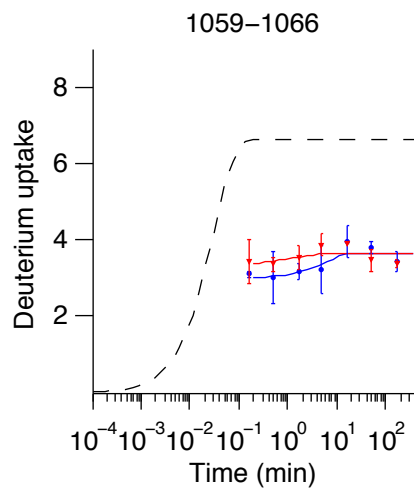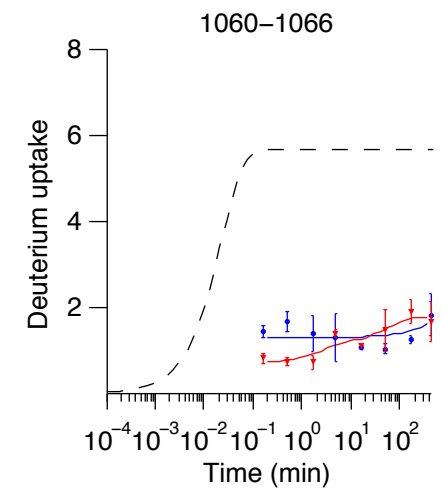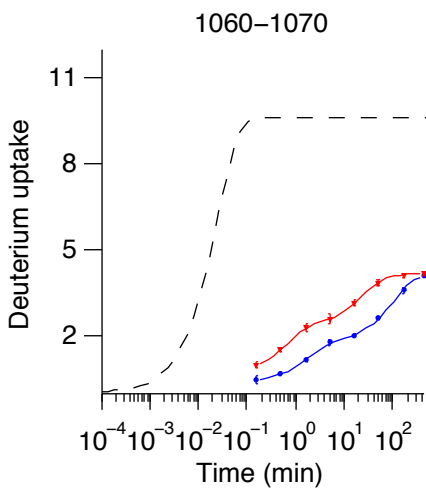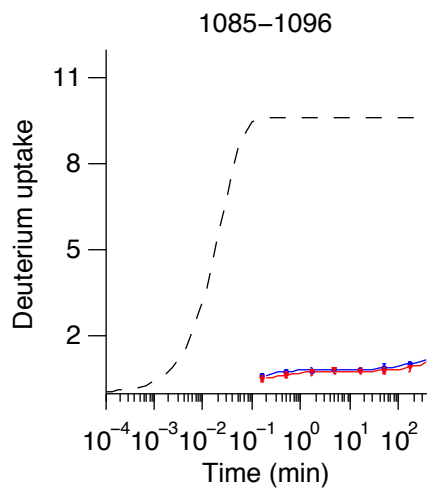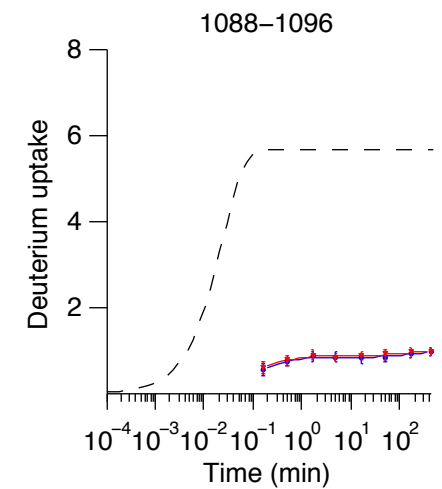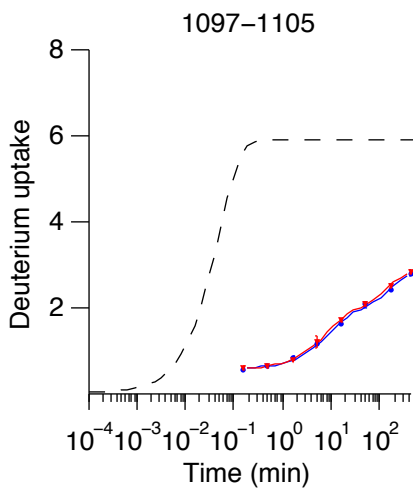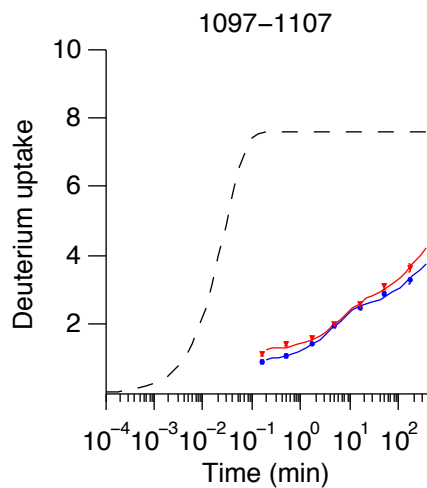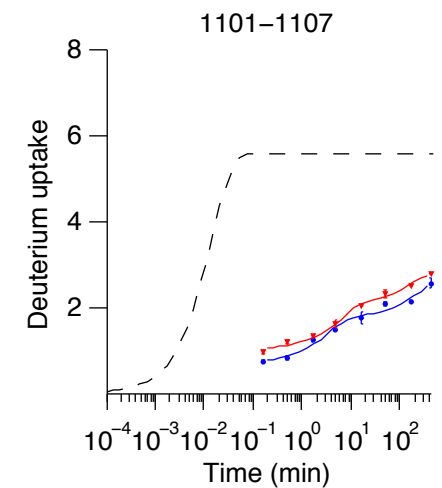

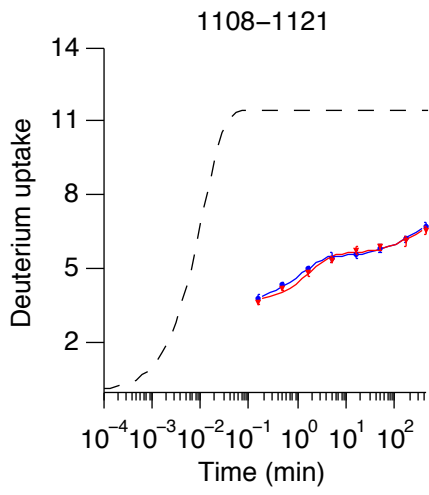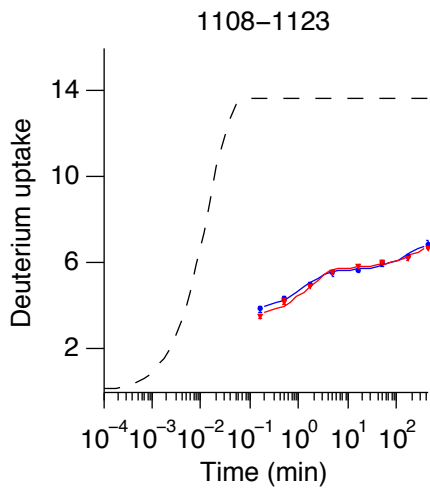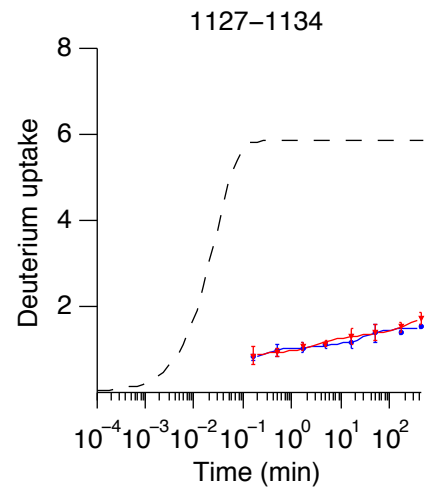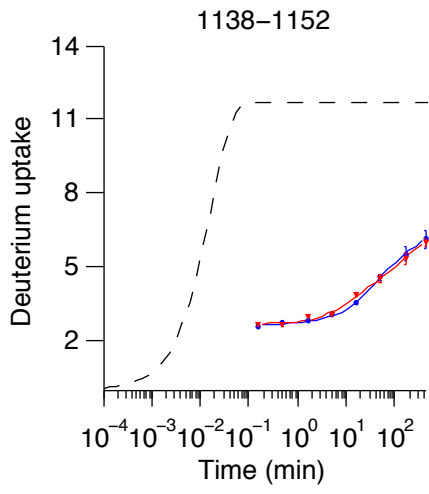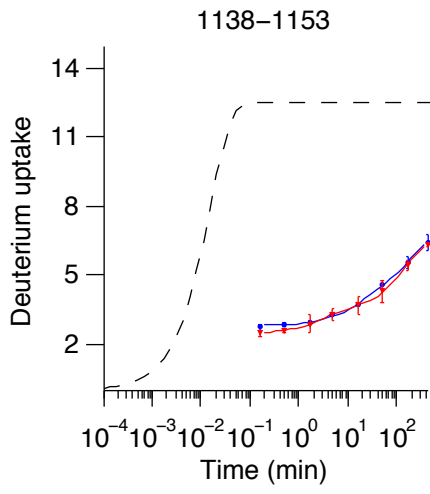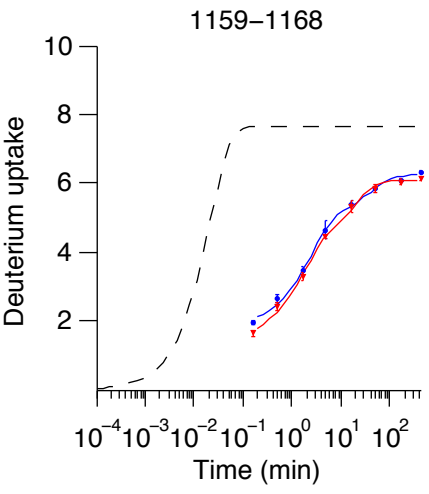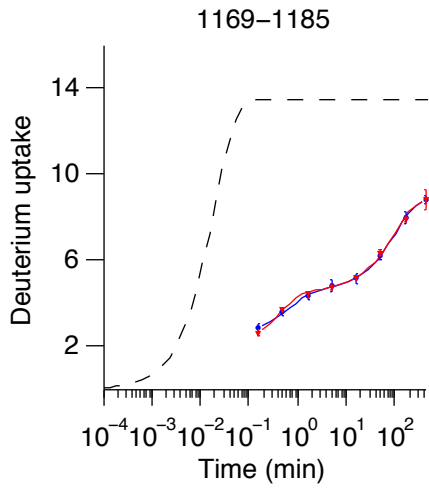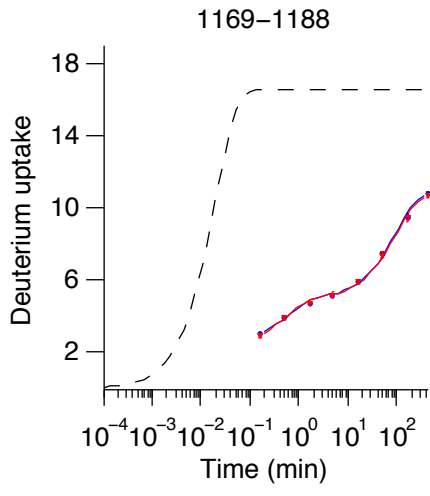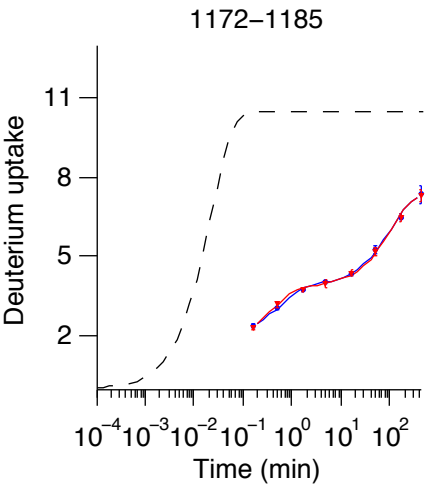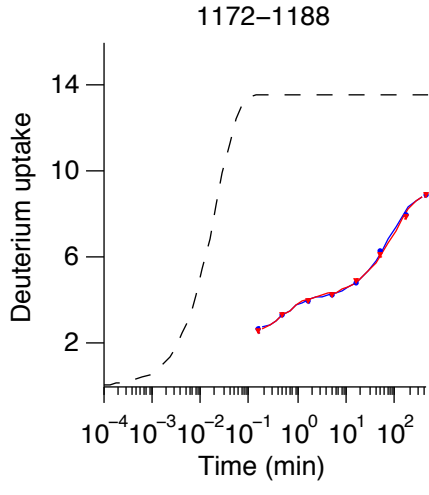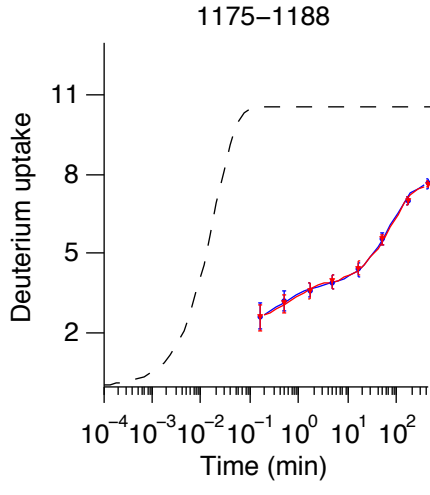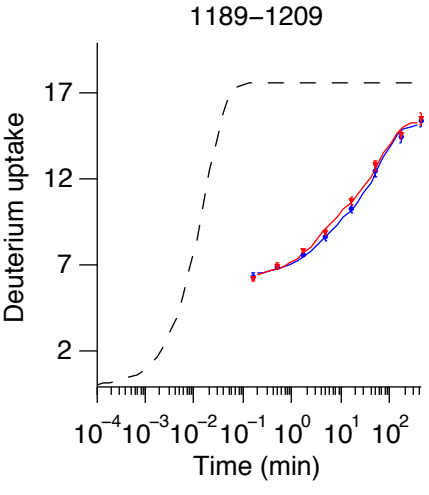

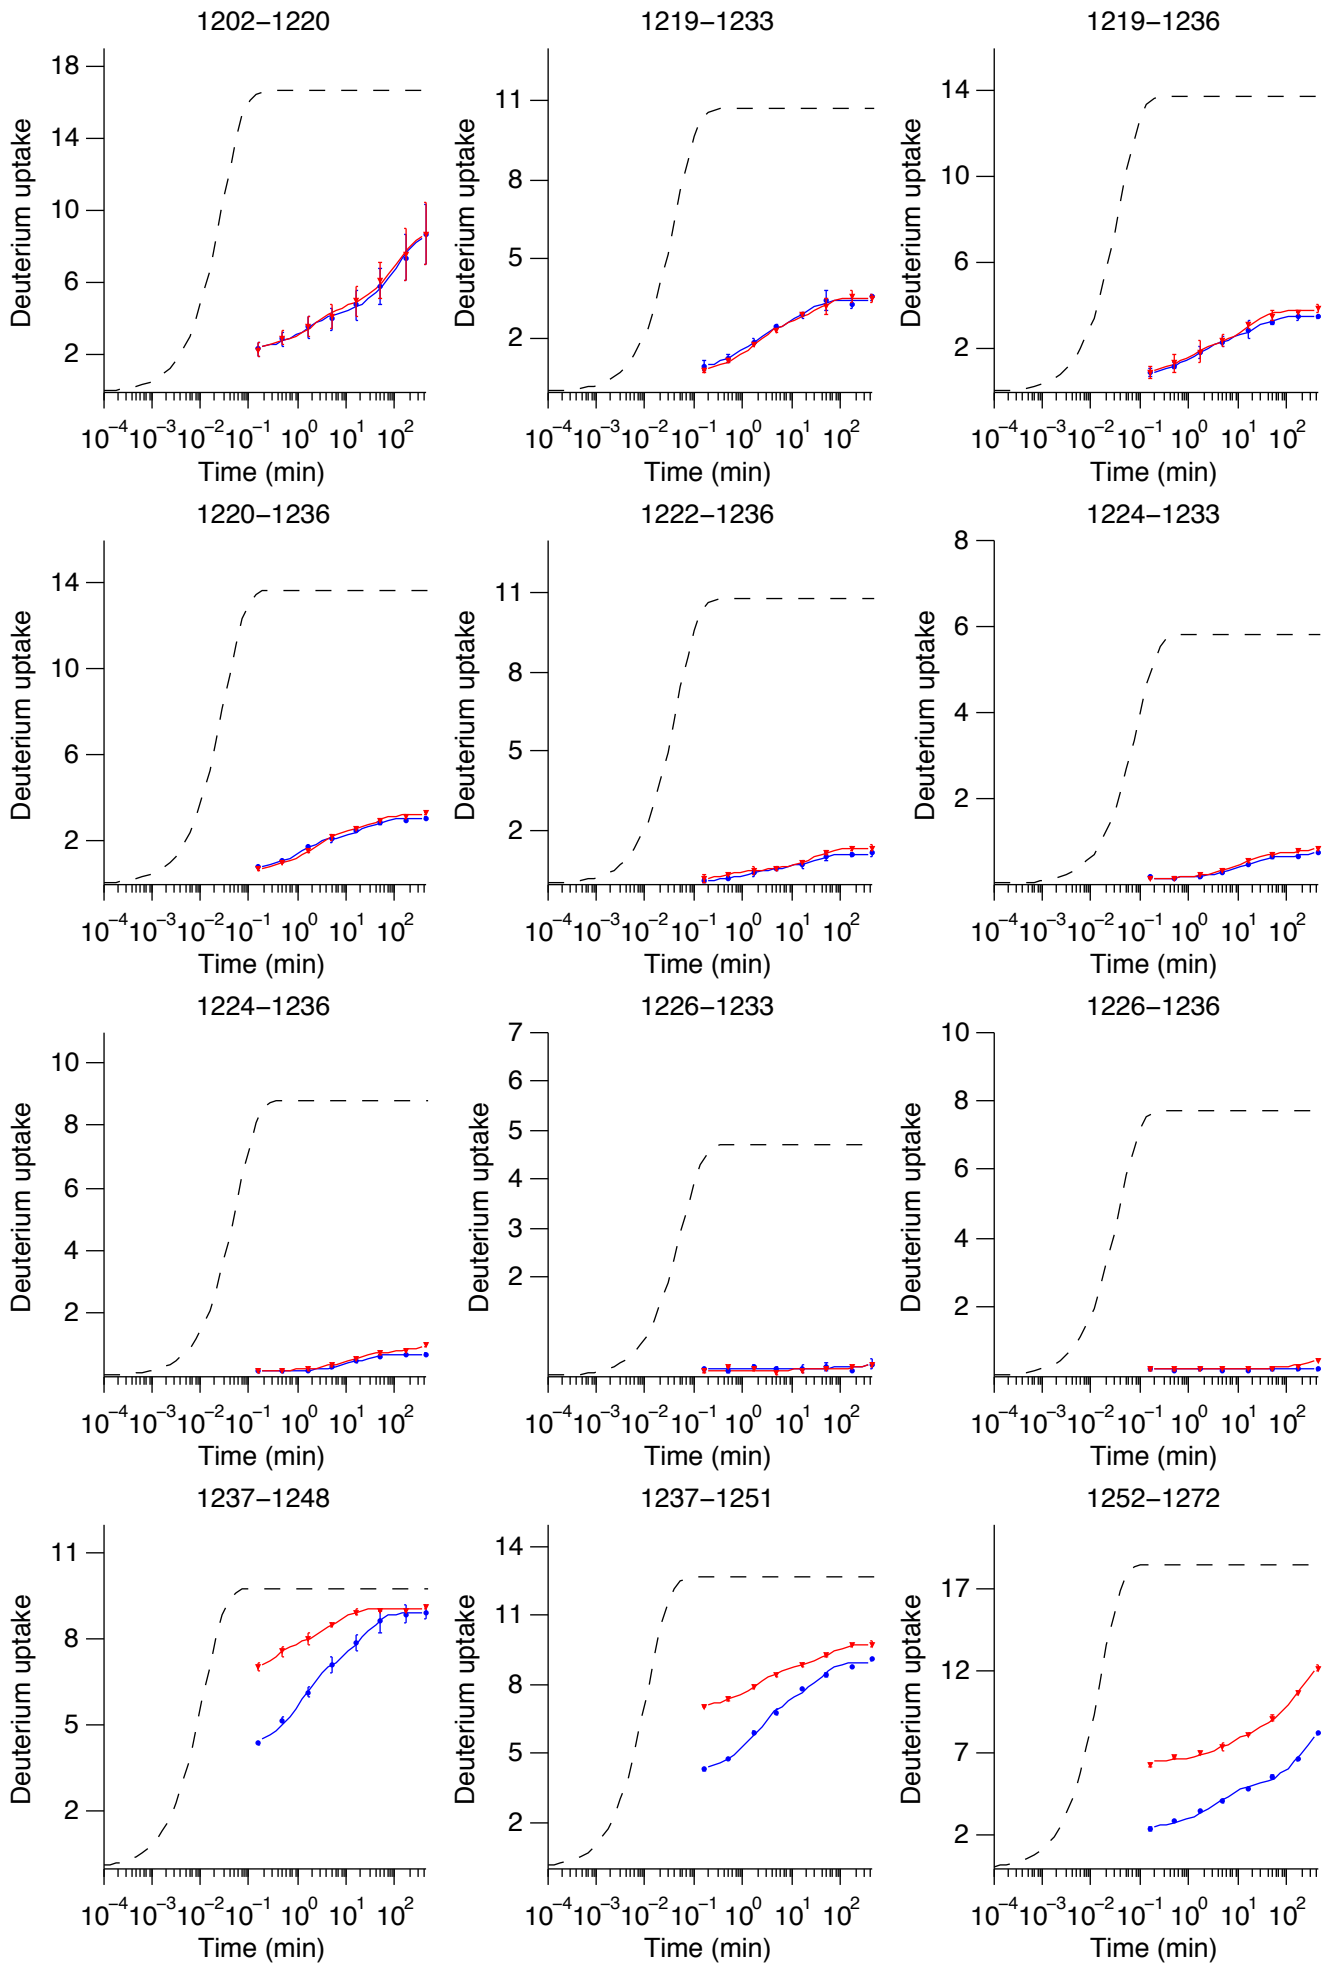

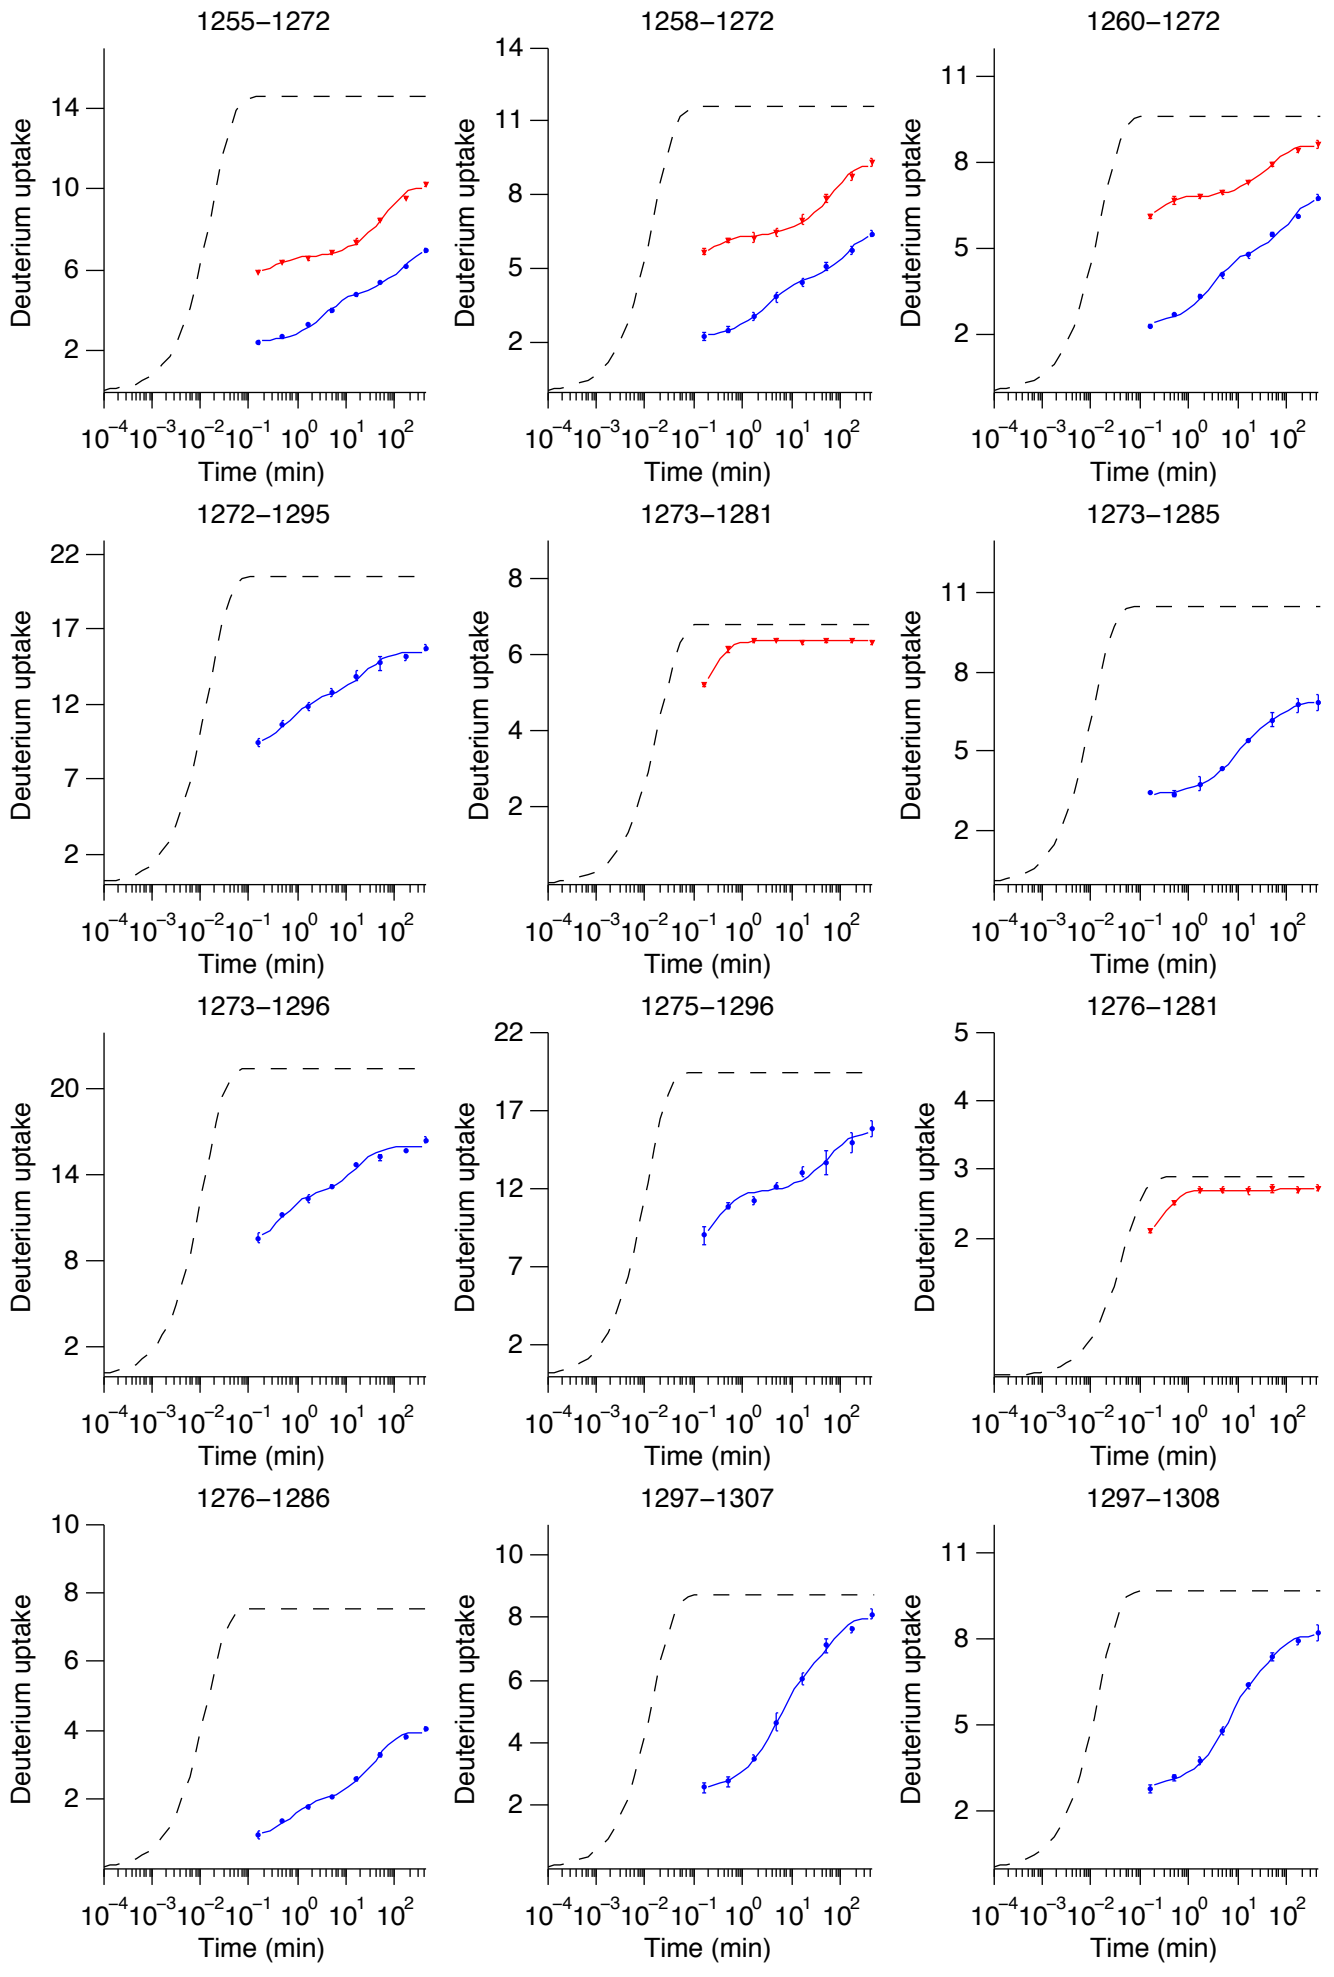

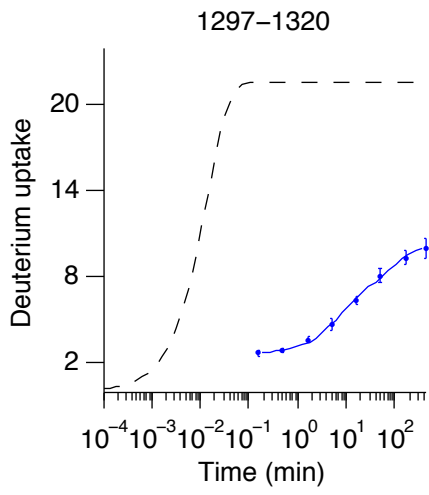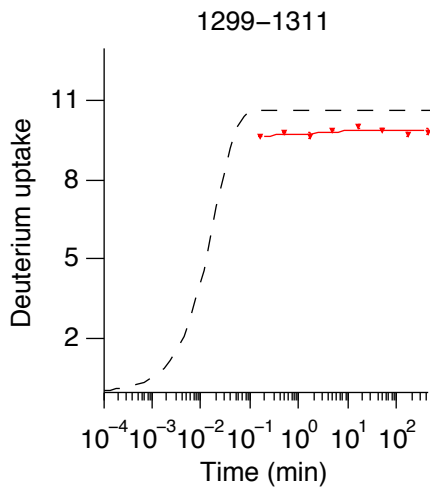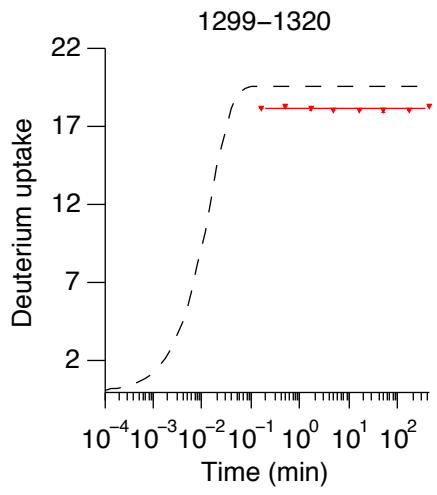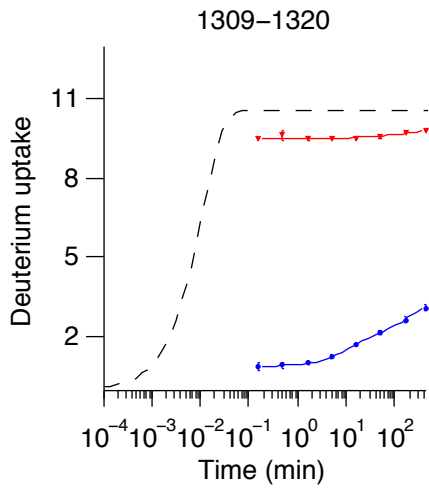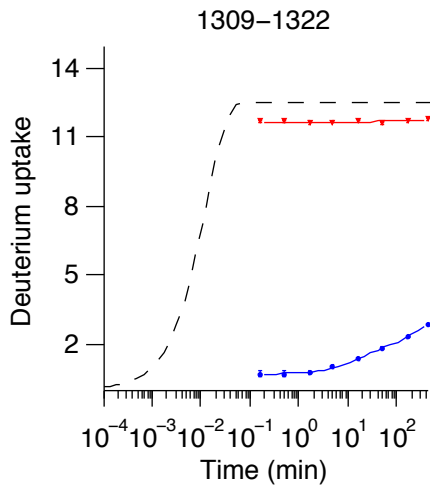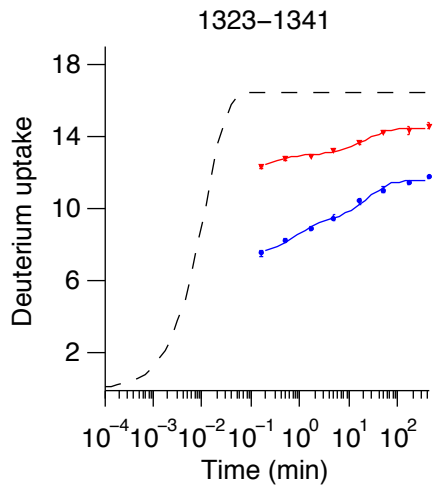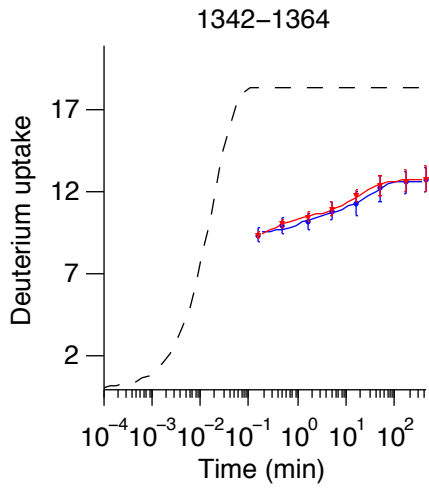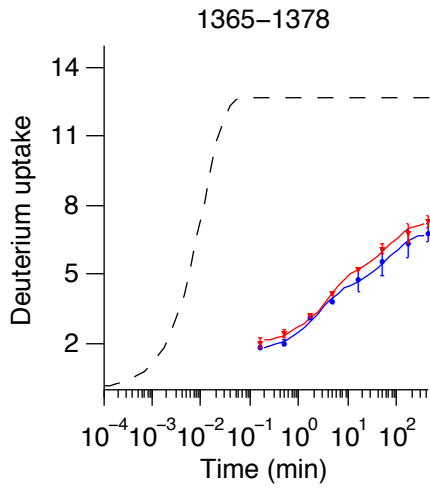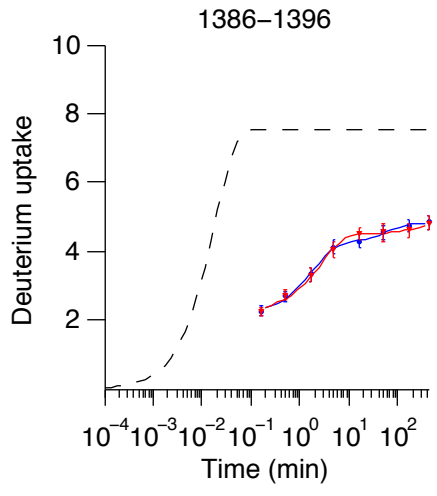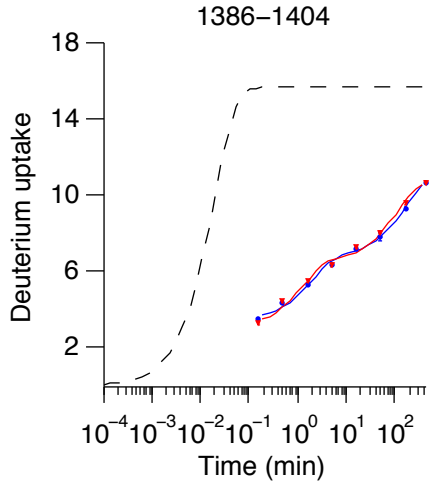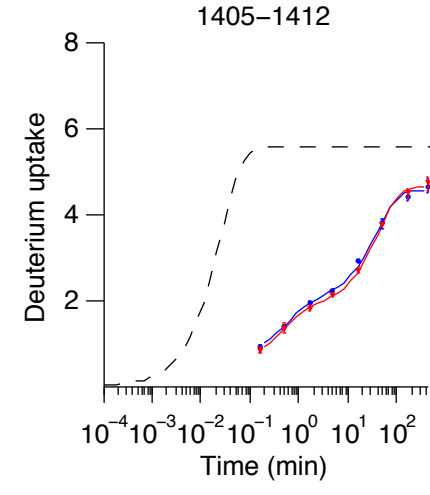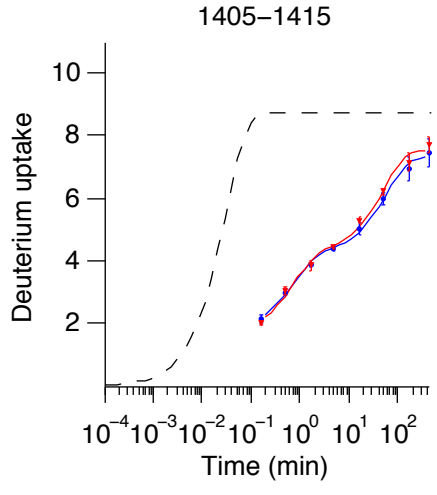

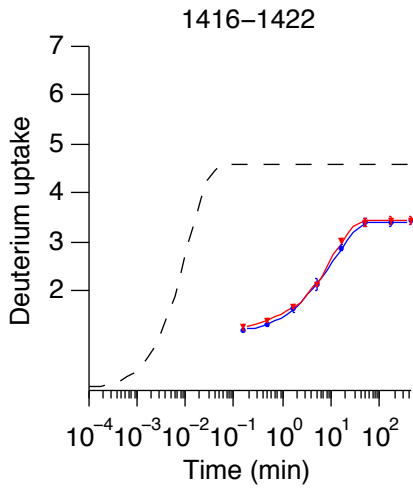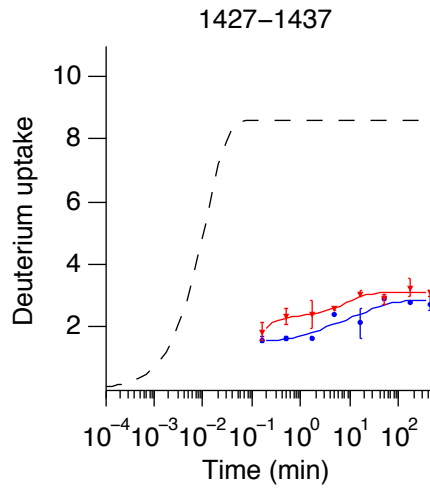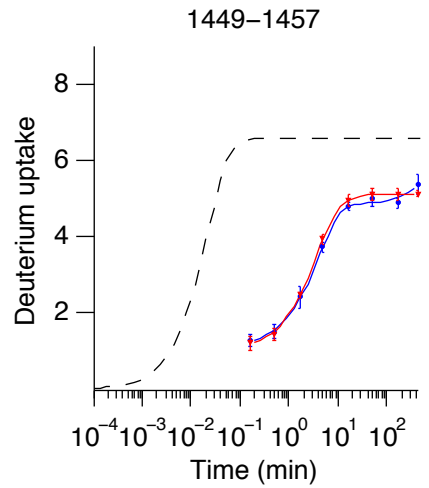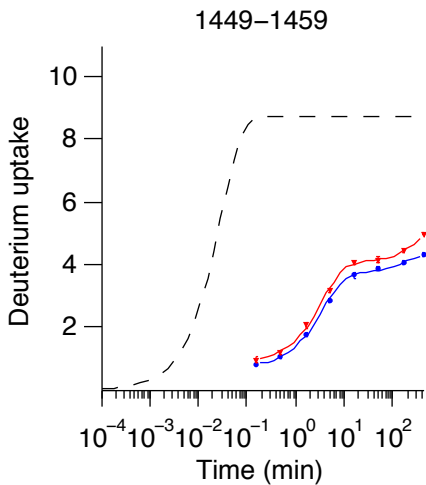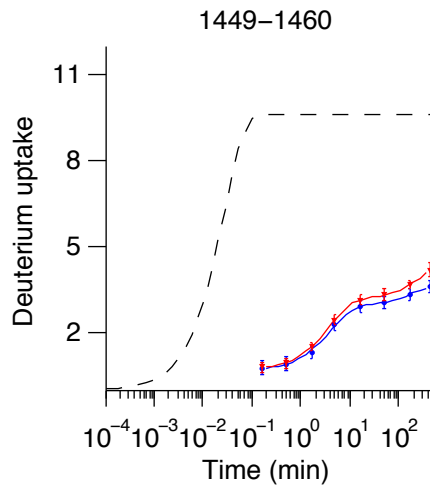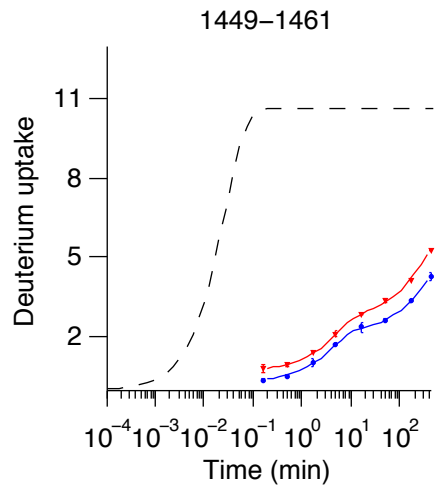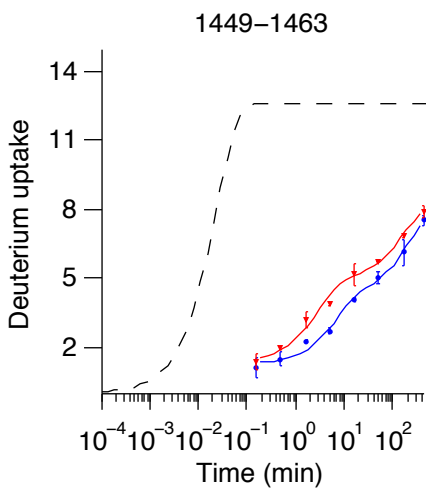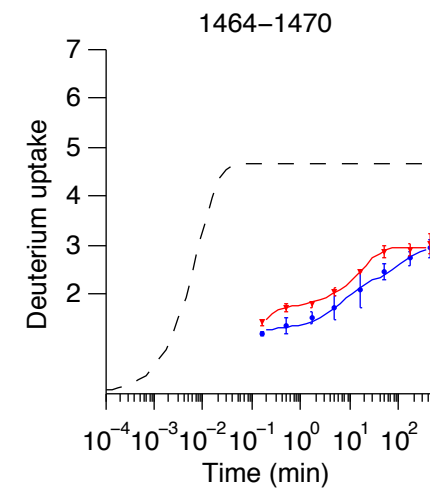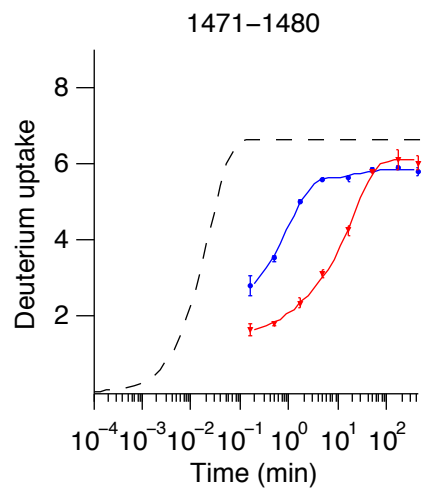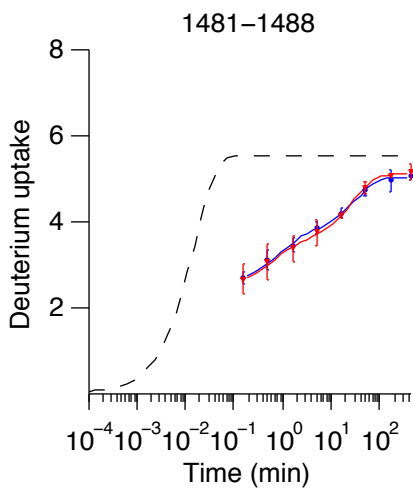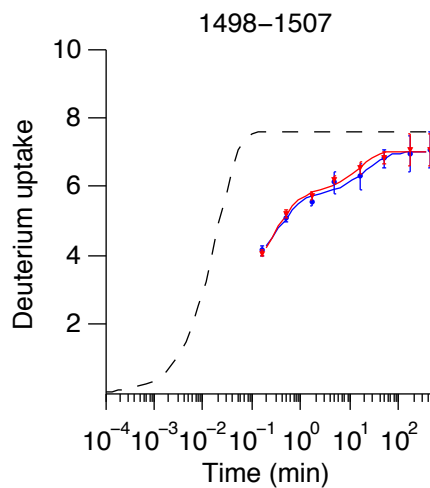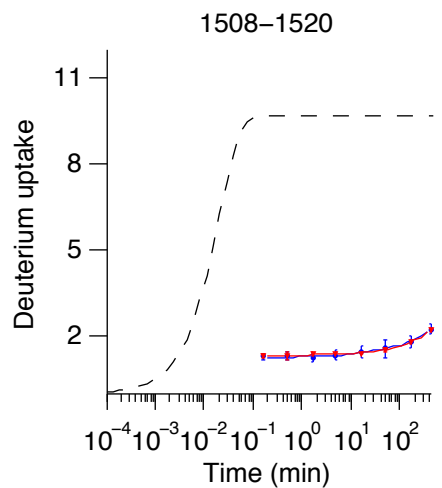

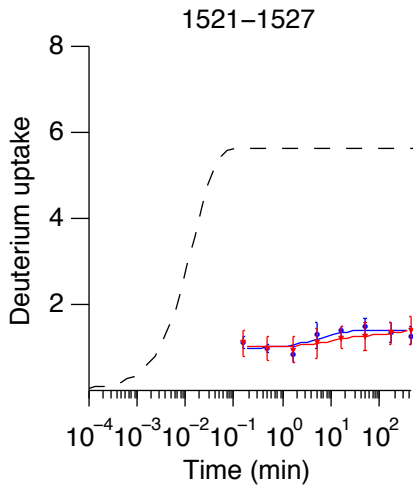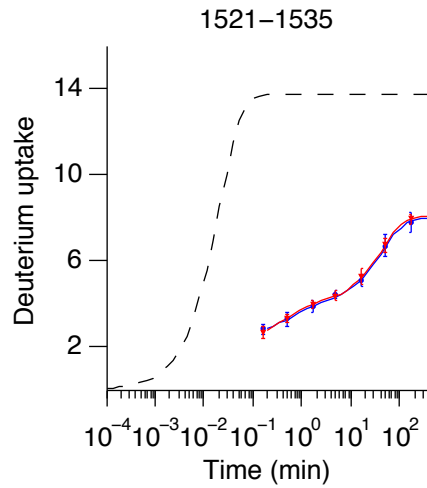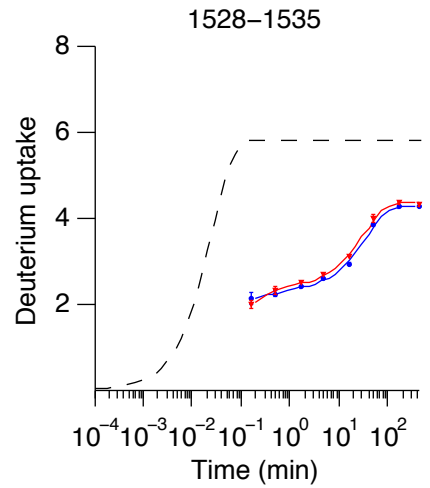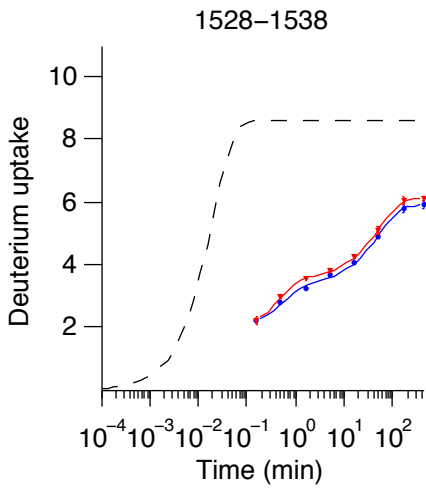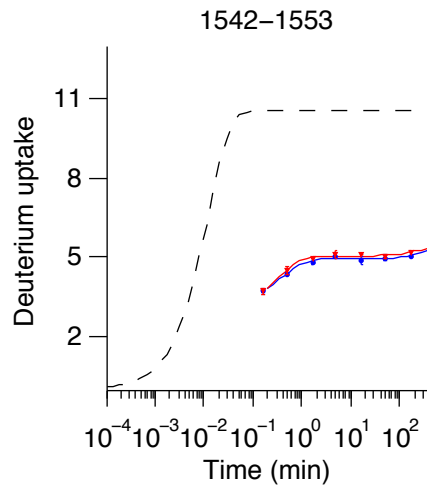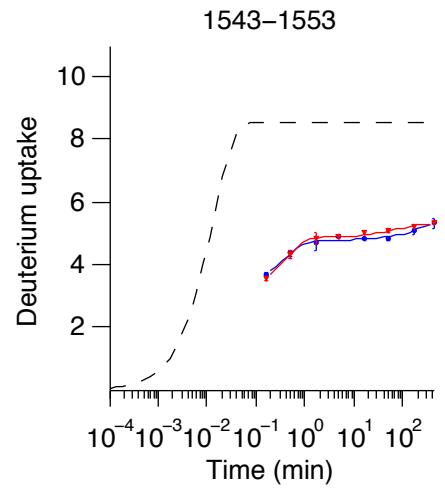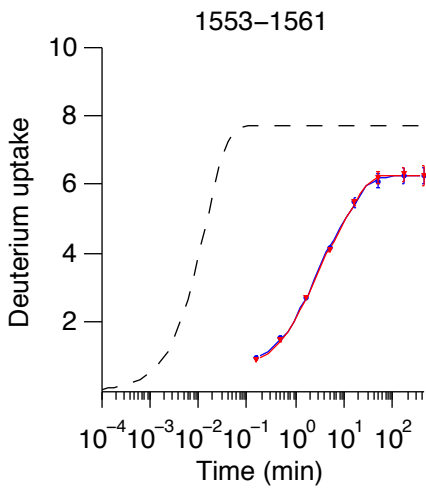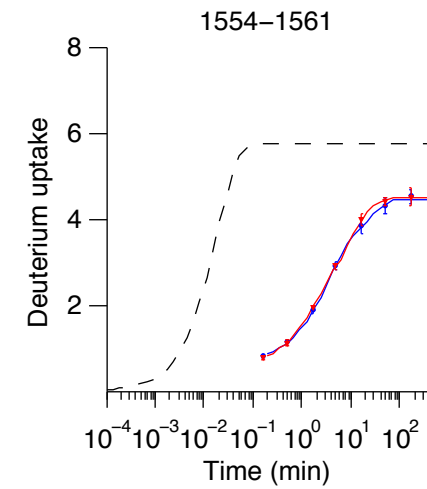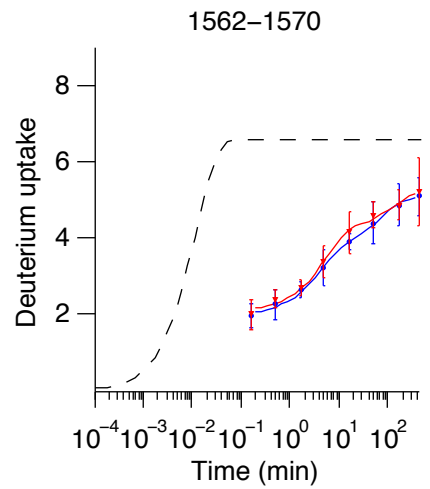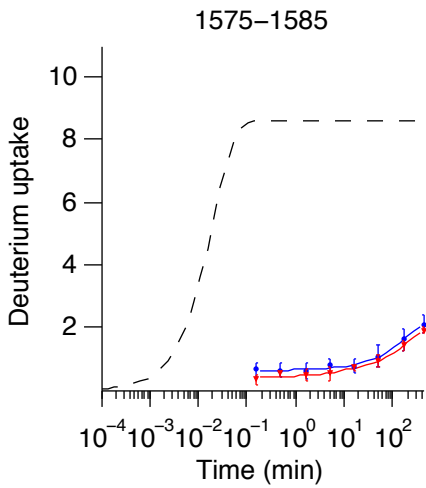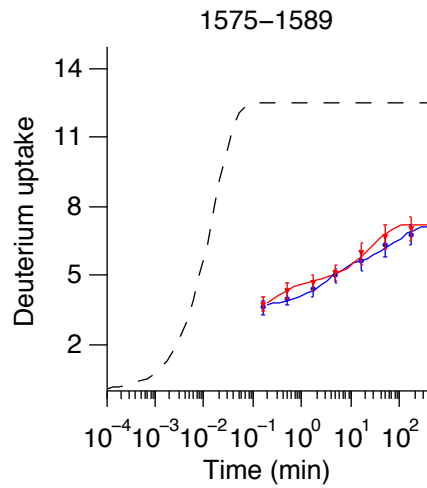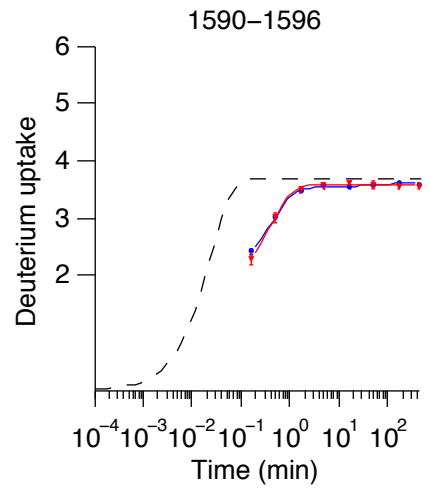

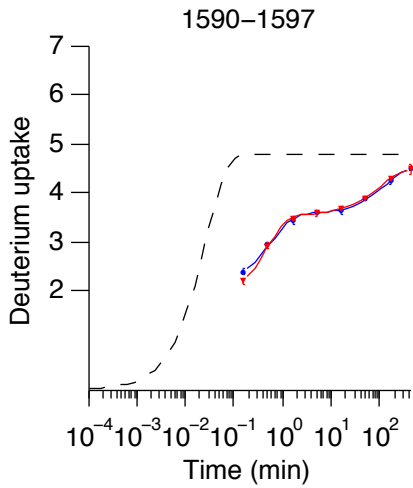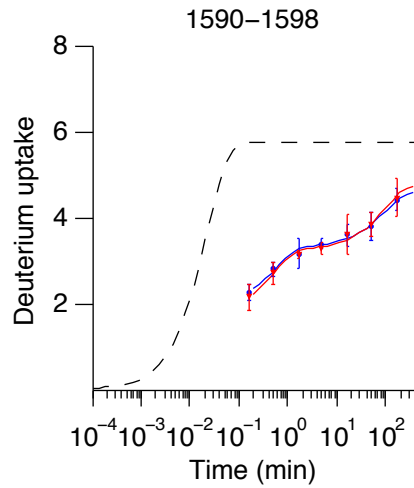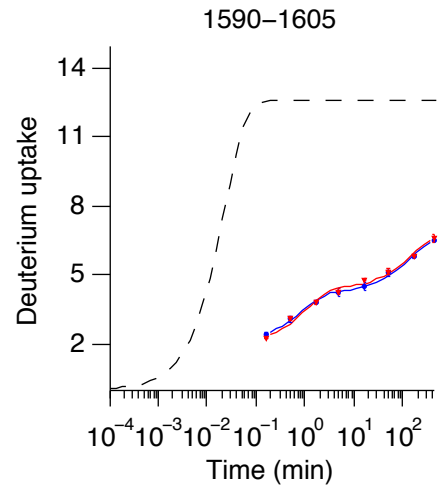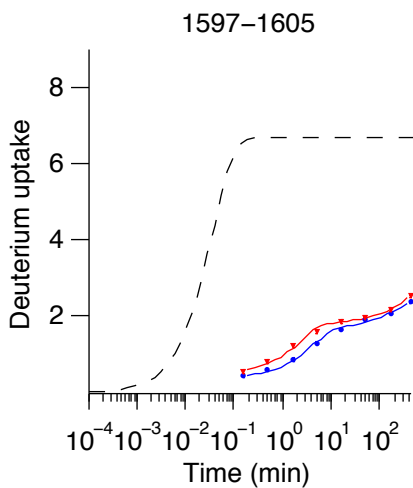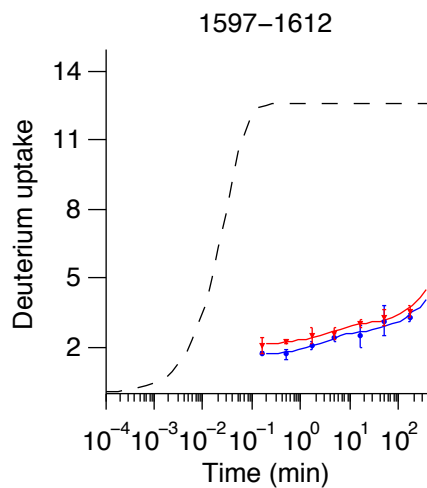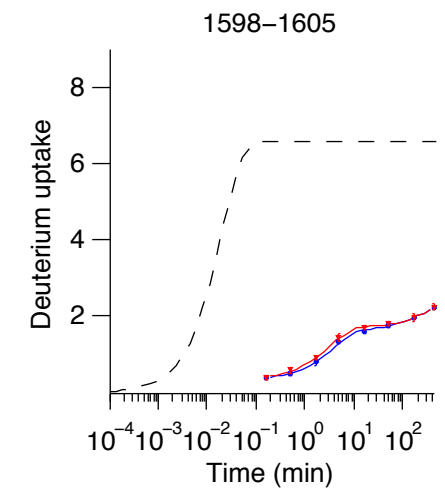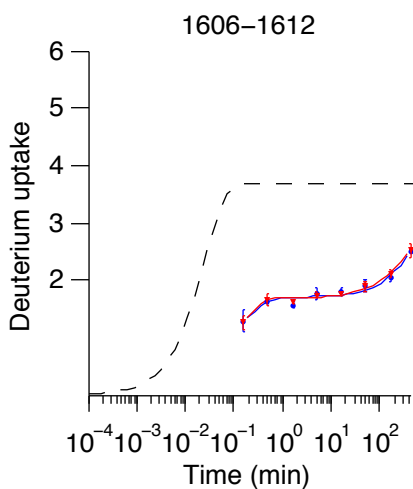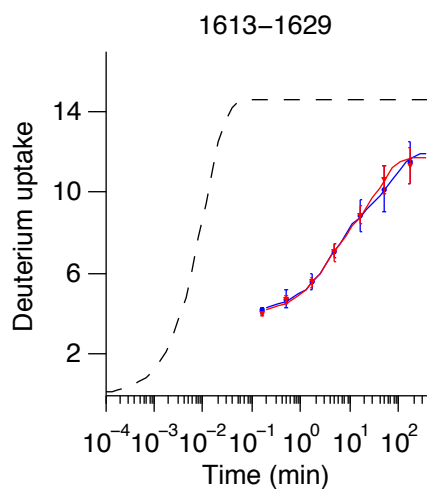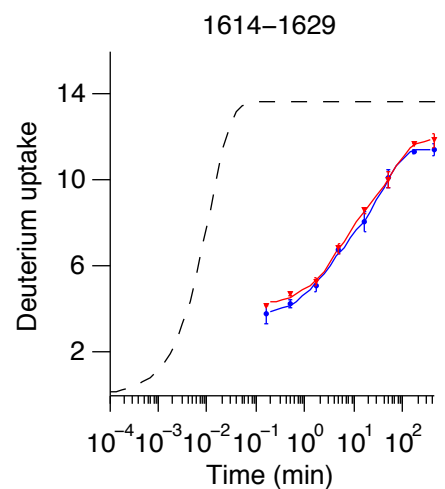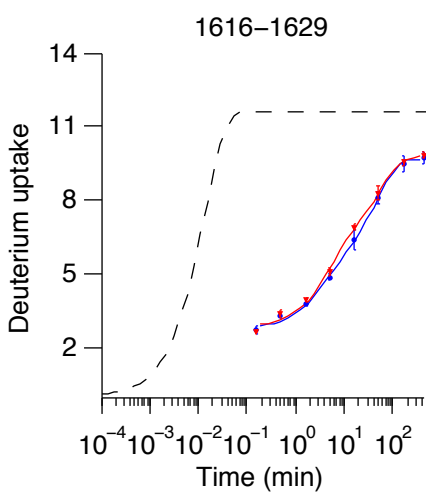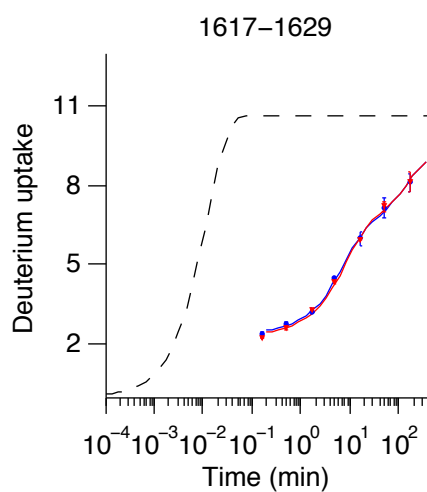



**Fig. S1: D-uptake plots of C3b and iC3b peptides.**

HX plots of C3b (blue curve) and iC3b (red curve) peptides generated by pepsin digestion, compared to respective reference curves (dashed lines) calculated for the case of no protection (2). Deuterium incorporation was measured in duplicate at 0.16, 0.5, 1.67, 5, 16.67, 50, 166.67 and 420 min; error bars are indicated. Peptide residue numbers are shown at the top of each plot.

Figure S2

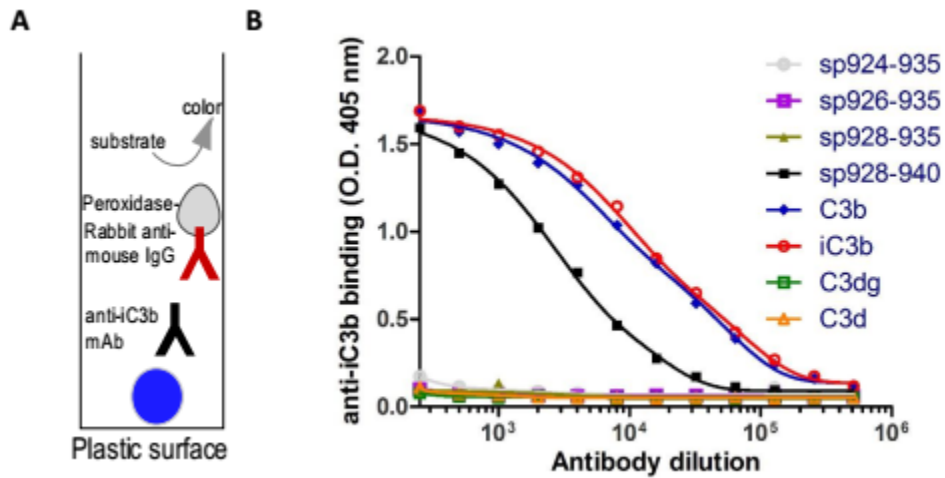

**Fig. S2: Anti-iC3b mAb reactivity using direct ELISA.**

**(A)** A direct ELISA was developed for detecting the binding activity of each synthetic peptide or C3 fragment to the anti-iC3b mAb. **(B)** A strong interaction between C3b/iC3b and the anti-iC3b mAb is observed, whereas the antibody does not react with C3dg/C3d; the affinity of the anti-iC3b mAb for C3b is likely caused by partial denaturation of C3b when directly coated on plastic surfaces (3), corroborated further by western blotting performed under denaturing conditions (Fig. 4C). Amongst the synthetic peptides tested, only sp928-940 is shown to bind to the anti-iC3b mAb indicating that this region contains the epitope.

Figure S3

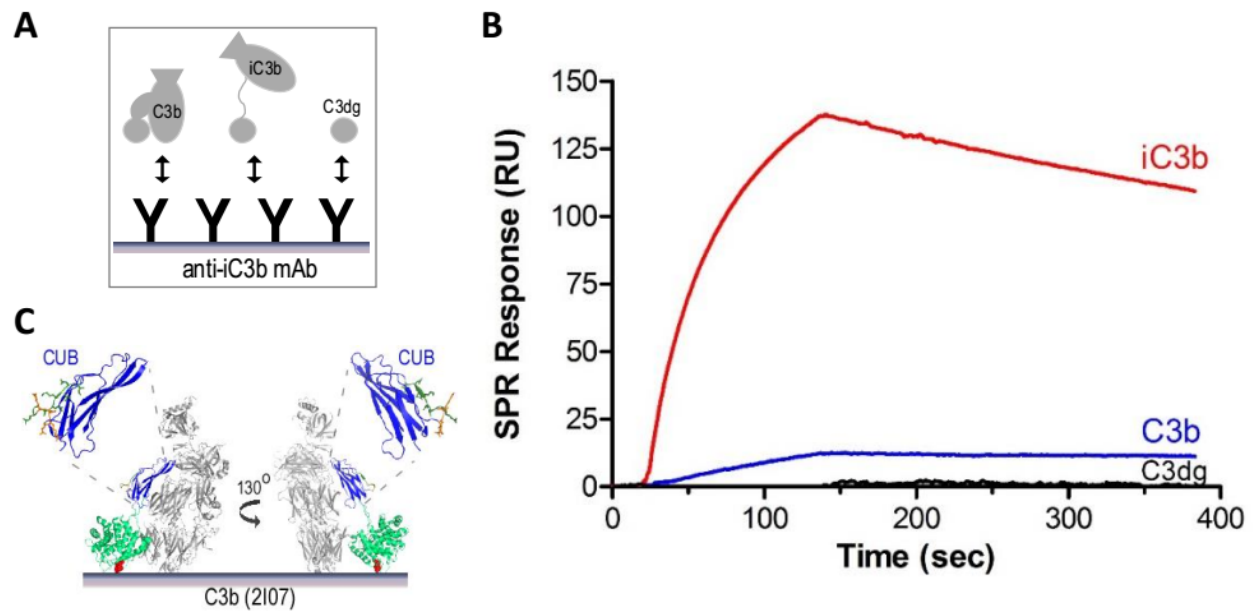

**Fig. S3: Binding profile of different C3 fragments to the captured anti-iC3b mAb.**

**(A, B)** Anti-iC3b mAb was captured on a SPR sensor chip via its Fc segment and C3 fragments (C3b, iC3b, C3dg) were injected at a single concentration (200 nM). The SPR signals were normalized by the molecular weight of each fragment. iC3b showed a >10-fold higher affinity for anti-iC3b mAb than did C3b, and no binding was observed for C3dg at this concentration. **(C)** The observed residual activity of the anti-iC3b mAb for C3b may be attributed to at least partial accessibility of the epitope in fluid-phase C3b.
